# 1 **Active sampling state dynamically enhances olfactory** 2 **bulb odor representation**

3 Rebecca Jordan<sup>1,2</sup>, Izumi Fukunaga<sup>3</sup>, Mihaly Kollo<sup>1,2</sup> and Andreas T. Schaefer<sup>1,2\*</sup>

4 1. Neurophysiology of Behaviour Laboratory, Francis Crick Institute, London, UK

5 2. Department of Neuroscience, Physiology & Pharmacology, University College London, UK

6 3. Sensory and Behavioural Neuroscience Unit, OIST Graduate University, Okinawa, Japan

7  
8 Correspondence and requests for materials, including custom software, should be addressed to A.T.S  
9 via email to [andreas.schaefer@crick.ac.uk](mailto:andreas.schaefer@crick.ac.uk) or R.J. via email to [rebecca.jordan@crick.ac.uk](mailto:rebecca.jordan@crick.ac.uk)

## 10 **Summary**

11 **The olfactory bulb (OB) is the very first site of odor information processing, yet a wealth**  
12 **of contextual and learned information has been described in its activity. To investigate**  
13 **the mechanistic basis of contextual modulation, we use whole-cell recordings to**  
14 **measure odor responses across rapid (<30 min) learning episodes in identified**  
15 **mitral/tufted cells (MTCs). Across these learning episodes, we found that diverse**  
16 **response changes occur already during the first sniff cycle. Motivated mice develop**  
17 **active sniffing strategies across learning, and it is this change of active sampling state**  
18 **that dynamically modulates odor responses, resulting in enhanced discriminability and**  
19 **detectability of odor representation with learning. Evoking fast sniffing in different**  
20 **behavioral states demonstrates that response changes during active sampling exceed**  
21 **those predicted from purely feed-forward input. Finally, response changes are highly**  
22 **correlated in tufted cells, but not mitral cells, indicating cell-type specificity in the effect**  
23 **of active sampling, and resulting in increased odor detectability in the tufted and**  
24 **enhanced discriminability in the mitral cell population over the rapid learning episodes.**  
25 **Altogether, we show that active sampling state is a crucial component in modulating**  
26 **and enhancing olfactory bulb responsiveness on rapid timescales.**

## 30 **Introduction**

31 The ability to respond to sensory stimuli according to learning and context is vital for  
32 orchestrating appropriate behavior. Our view of sensory processing has shifted away from the  
33 simplicity of passive feed-forward models driven by sensory stimuli, to one that additionally  
34 incorporates contextual information provided by top-down circuits into the ongoing processing  
35 (Engel et al., 2001). This has been driven in part by observations that activity in primary  
36 sensory cortex is widely modulated by contextual information: locomotion, attention, reward  
37 timing and experience all modulate visual cortex activity (Chubykin et al., 2013; Fiser et al.,  
38 2016; Ito and Gilbert, 1999; Niell and Stryker, 2010), while whisking behavior and social  
39 context modulate barrel cortex activity (Crochet and Petersen, 2006; Ferezou et al., 2006;  
40 Lenschow and Brecht, 2015).

41 The olfactory bulb (OB) is the very first site of odor information processing, yet already  
42 modulation of OB neural output by a wealth of contexts and behavioral tasks has been  
43 described from recordings of suprathreshold activity, including unit recordings, calcium  
44 imaging, and LFP recordings. These include modulation of odor responses by hunger state  
45 (Pager, 1974; Pager et al., 1972), task-engagement (Fuentes et al., 2008), reward anticipation  
46 (Doucette and Restrepo, 2008), conditioned aversion (Kass et al., 2013), and even non-  
47 olfactory events (Kay and Laurent, 1999; Rinberg et al., 2006). Recently, a number of studies  
48 have described changes in mitral and tufted cell (MTC) odor responses over the course of  
49 olfactory learning (Chu et al., 2016; Doucette and Restrepo, 2008; Yamada et al., 2017).  
50 Despite the prominence of such studies, the mechanistic basis underlying contextual  
51 modulation of the circuit is still unclear. In particular, rarely have these contextual modulations  
52 been interpreted in the framework of active sampling behavior, which is known to be controlled  
53 in a complex and context dependent manner (Wachowiak, 2011), including over the learning  
54 of olfactory tasks (Kepecs et al., 2007; Wesson et al., 2008, 2009; Youngentob et al., 1987).  
55 Not only this, but unit recordings as well as imaging do not have access to subthreshold

56 activity, while the former also has the potential to misidentify cell types and bias recordings  
57 toward a subpopulation of MTCs that have high baseline firing rates (Kollo et al., 2014).

58 To investigate the mechanistic basis of task dependent changes in mitral and tufted cell odor  
59 responses, we recorded from identified mitral and tufted cells using blind whole-cell recordings  
60 *in vivo* in a range of behavioral states. We optimised training protocols for an olfactory task to  
61 facilitate very rapid olfactory discrimination learning episodes, which allowed us to make  
62 whole-cell recordings over the full learning epoch. At the same time, we measured sniffing  
63 behavior using an external flow sensor. Altogether, we provide evidence that learned active  
64 sampling behavior overtly modulates olfactory responses in a cell-type specific way that  
65 cannot be explained by feed-forward input, and overall appears to enhance the representation  
66 of odors across the olfactory bulb.

## 67 **Results**

### 68 ***There are differences in odor responses according to behavioral state***

69 We recorded from 23 MTCs in passive mice exposed to repeated stimulation of odor mixtures  
70 (Figure S1), as well as 21 MTCs in mice during learning of a simple olfactory go/no-go  
71 discrimination task with the same mixtures. In our task-learning mice, after pre-training on  
72 different odorants (Figure S2A), mice underwent very rapid learning on a novel pair of odor  
73 stimuli, reaching criterion within 10-20 minutes (Figure S2B). It was thus possible to make  
74 stable whole-cell recordings over the full timescale of learning. MTCs were distinguished from  
75 interneurons as previously described (Kollo et al., 2014), using independent component  
76 analysis of the AHP waveform. This was confirmed with morphological reconstruction of 9  
77 MTCs (Figure S3; see methods).

78 To first determine whether the two behavioral states cause any general change in olfactory  
79 bulb physiology, we applied a series of current steps and compared the basic properties of  
80 cells between the passive and learning states. Both the passive properties (resting membrane  
81 potentials, input resistance and membrane time constants) and spontaneous activity

82 (spontaneous firing rates and sniff phase-modulation of membrane potential – ‘sniff- $V_m$  mod.’)  
83 of cells revealed little detectable difference in either average values or variance (see  
84 supplemental information; Figure S4A-F).

85 Next, basic odor response properties were compared between MTCs in passive (Figure 1A;  
86 46 cell-odor pairs) and task-learning mice (Figure 1B; 42 cell-odor pairs). Note that all odor  
87 responses in the manuscript are aligned on each trial to the first inhalation onset. Comparing  
88 passive and learning cohorts by averaging responses across all trials for a given cell-odor pair  
89 revealed that firing rate (FR) responses did not overtly differ in distribution between passive  
90 and behaving mice (Figure S4G-H). Median FR responses were similar (passive: median  
91 = -0.84 Hz, IQR = -2.2-1.1 Hz; learning: median = -0.51 Hz, IQR = -2.8-2.1 Hz,  $p = 0.84$ ,  
92 Ranksum), as was variance across cell-odor pairs ( $p = 0.42$ , Brown-Forsythe test). Measuring  
93 a cell’s input using subthreshold responses offers us a more sensitive measure of many  
94 response parameters, including temporal features and inhibition. Taking average membrane  
95 potential responses revealed that these do not differ much between the two behavioral states  
96 in terms of means (passive: mean = -1.5 mV, SD = 1.8 mV; learning: mean = -1.7 mV, SD =  
97 2.4 mV;  $p = 0.67$ , unpaired t-test; Figure 1C<sub>i-ii</sub>), however response variance was larger across  
98 cells in learning mice relative to passive mice, due to higher representation of both strong  
99 inhibition and excitatory responses ( $p = 0.05$ , unpaired t-test,  $n = 42$  vs 46; Figure 1C<sub>ii</sub>).

100 We next compared temporal features of the subthreshold responses. Comparing response  
101 onsets between passive and learning mice revealed a significant shift towards earlier onsets  
102 in learning mice (passive: median = 85 ms, IQR = 70-110 ms,  $n = 39$ ; learning: median = 70  
103 ms, IQR = 60-90,  $n = 36$ ;  $p = 0.004$ , Ranksum; Figure 1D), with 33% of responses occurring  
104 before 70 ms in learning mice, and only 10% in passive mice. Just as for baseline activity  
105 (Figure S4F), activity during odor response is often locked to the sniff cycle. We calculated the  
106 amplitude of membrane potential modulation when aligned to sniff phase (sniff- $V_m$  modulation  
107 amplitudes) during the odor response (Figure 1E; see methods for details) to quantify to what

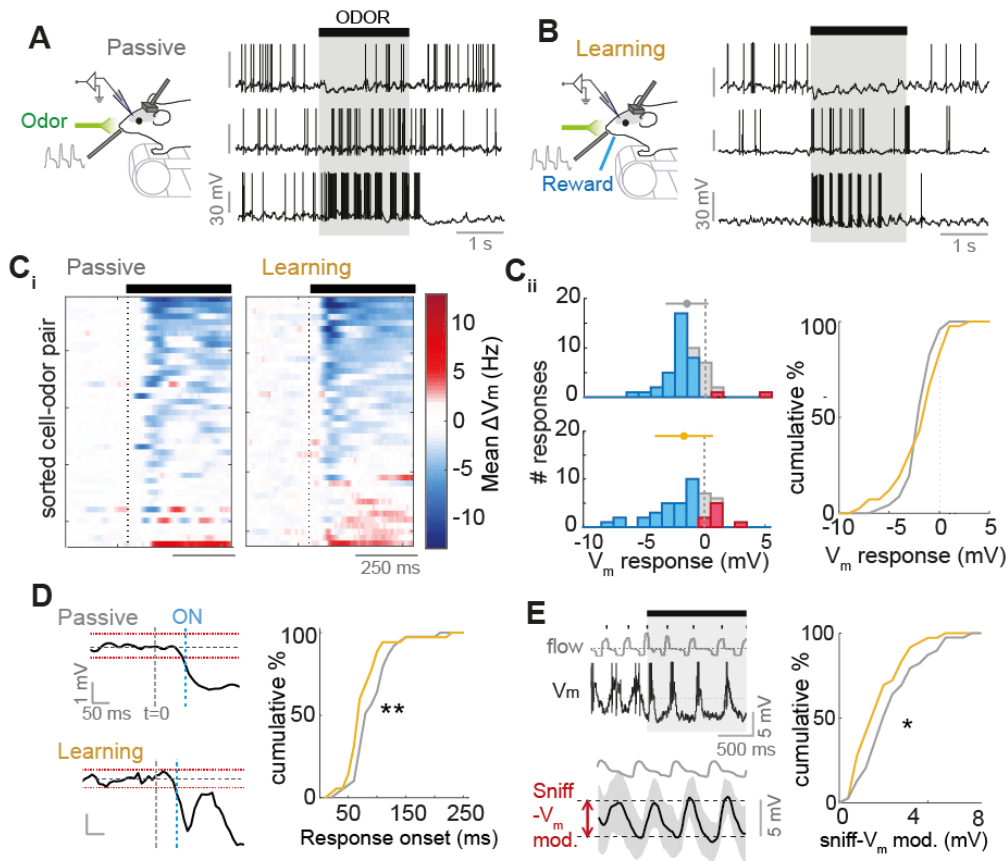

**Figure 1. Differences in odor responses according to behavioral state.**

(A) Example odor response traces for three different cell-odor pairs recorded in passive mice, aligned to first inhalation onset. (B) As for panel A, but for cell-odor pairs recorded in learning mice. C<sub>i</sub>) Heatmap of  $V_m$  responses averaged across all trials for each cell-odor pair, sorted by mean 500 ms  $V_m$  response, for both passive ( $n=46$ ) and learning ( $n=42$ ) datasets. Black bar indicates odor stimulus, aligned to first inhalation onset. (C<sub>ii</sub>) Left: Histograms of average 500 ms  $V_m$  responses for (top) passively exposed and (bottom) learning mice. Right: cumulative histograms comparing average  $V_m$  response data for passive (grey) and learning (gold) cell-odor pairs. (D) Comparison of response onset latency for learning and passive mice. Left shows examples: average membrane potential waveforms averaged over all trials.  $t=0$  indicates when the odor turned on, aligned to the first inhalation onset. Red dotted lines indicate upper bounds and lower bounds (calculated as mean  $\pm$  SD of the baseline membrane potential). When the  $V_m$  waveform rises above or below the upper or lower bound respectively for at least 50 ms, this is when response onset is defined (blue dotted line, ON). Right: cumulative histograms to compare response onsets for passive and learning mice. (E) Left: example of a highly sniff-locked odor response from a passive mouse across the first 4 sniff cycles. ‘Flow’ shows nasal flow trace. Below trace shows example average phase aligned membrane potential for first four sniffs of the odor response. Shaded area shows SD. ‘Sniff- $V_m$  mod.’ indicates the calculation of sniff- $V_m$  modulation amplitude (see methods). Right: Cumulative histograms to compare sniff-modulation amplitudes for passive and learning mice.

108 degree each cell-odor pair was locked to the sniff cycle during odor stimulation. Overall,  
 109 passive cell-odor pairs showed a significantly higher degree of patterning by the sniff cycle

110 than learning cell-odor pairs (passive sniff- $V_m$  modulation amplitude= $3.1\pm 1.7$  mV,  $n=42$ ;  
111 learning:  $2.4\pm 1.4$  mV,  $n=38$ ,  $p=0.03$ , unpaired t-test; Figure 1E).

112 Overall, this analysis revealed that the most overt differences between passive and learning  
113 mice were measurable in subthreshold responses, which showed increased variance, shorter  
114 latency and less sniff coupling in learning mice. We thus focused primarily on subthreshold  
115 responses for the next set of analyses.

116 ***Diverse odor response changes occur within the very first sniff cycle in learning mice***

117 Recent imaging work has suggested that MTC responses are subject to change in both  
118 learning and passive mice over long timescales (Chu et al., 2016; Doucette and Restrepo,  
119 2008; Yamada et al., 2017). To assess whether the increased response variance apparent in  
120 learning animals (Figure 1Cii) developed across rapid go/no-go task learning (Figure 2A), we  
121 compared the subthreshold response of each cell-odor pair in early trials where the mouse is  
122 performing at chance levels, with the response in late trials where the mouse is performing at  
123 criterion or above (Figure 2B). Since median reaction times in the task were 500 ms (Figure  
124 S2C), we focused our analyses on the first 500 ms of odor response.

125 We noticed that there were diverse changes in odor response occurring over the course of  
126 learning: for example, overt increases in excitatory response (Figure 2C and S5A), as well as  
127 increases in inhibitory response (Figure 2D), which developed across trials. Overall, in learning  
128 mice, 30% (13/42) of cell-odor pairs showed a significant change across learning ( $p<0.01$ ,  
129 unpaired t-test between 5 early and 5 late trials), with 19% (8/42) showing a positive change,  
130 and 11% (5/42) showing a negative change (Figure 2E; Figure S5C). These changes led to  
131 an increase in the diversity of responses between early and late trials across the sample,  
132 though this did not quite reach significance (early SD = 2 mV, late SD = 2.6 mV;  $p = 0.06$ ,  
133 Bartlett test). On a trial by trial basis, changes in excitatory subthreshold response were  
134 reflected by changes in firing rate, though this was not clear for changes in inhibition (Figure  
135 S5A-B). In contrast to learning mice, cell-odor pairs recorded in passive mice showed far less

136 frequent significant changes (4%, 2/46 cell-odor pairs), and no change in variance across the  
137 sample (SD early = 1.9 mV, SD late = 2.0 mV,  $p = 0.58$ , Bartlett test; Figure 2E and S5D).  
138 Overall, there was significantly higher variance in response changes for cell-odor pairs  
139 recorded in learning compared to passive mice (learning  $\Delta V_m$  SD = 1.5 mV; passive  $\Delta V_m$  SD  
140 = 1.1 mV;  $p = 0.02$ , Bartlett test; Figure 2F). Learning-related changes were not due to time-  
141 dependent effects of recording, since recording durations in passive and learning were  
142 matched (Figure S5E). Response changes did not reflect the contingency of the odor or  
143 response of the animal, since the distribution of changes showed no significant difference  
144 between CS+ and CS- stimuli ( $p = 0.77$ , paired t-test; Figure S5F), and were even correlated  
145 ( $R^2 = 0.44$ ,  $p = 0.001$ ; Figure S5G).

146 What aspects of the response change could potentially be used to aid decision making? Mice  
147 are known to make simple olfactory discriminations within the timescale of a single sniff cycle.  
148 Congruently here, we find reaction times as low as 170 ms (Figure S2C-D). By identifying the  
149 onset of response change (see methods), we could show that 71% of identifiable changes  
150 occurred prior to 170 ms (median  $\Delta V_m$  onset = 120 ms, IQR = 20-220 ms, Figure 2G and S5H),  
151 and 45% occurred prior to the 1st percentile of sniff durations (107 ms; Figure S5J). Thus,  
152 changes occur within the timescale of a single sniff cycle, and therefore could contribute to  
153 decision making. To assess the functional consequence of the learning-related changes for  
154 odor representation within this short timescale, we constructed a population response vector  
155 from the full sample of cell-odor pairs (similar to Figure S5C-D) and calculated the Euclidean  
156 distance of this population response vector from baseline data (see methods for details). We  
157 found that peak detectability within the first 170 ms of odor response significantly increased  
158 between early and late trials (peak early =  $31.9 \pm 0.8$  mV, late =  $40.1 \pm 1.0$  mV;  $p = 4 \times 10^{-5}$ ,  
159 unpaired t-test,  $n=5$ ; Figure 2H), while no such significant changes were observed for passive  
160 exposure (peak early =  $35.3 \pm 0.3$  mV, late =  $37.1 \pm 1.6$  mV;  $p = 0.06$  unpaired t-test,  $n=5$ ;  
161 Figure 2H). By calculating Euclidean distances between response vectors for CS+ and CS-  
162 stimuli, we also observed a significant increase in discriminability of the two odors across the

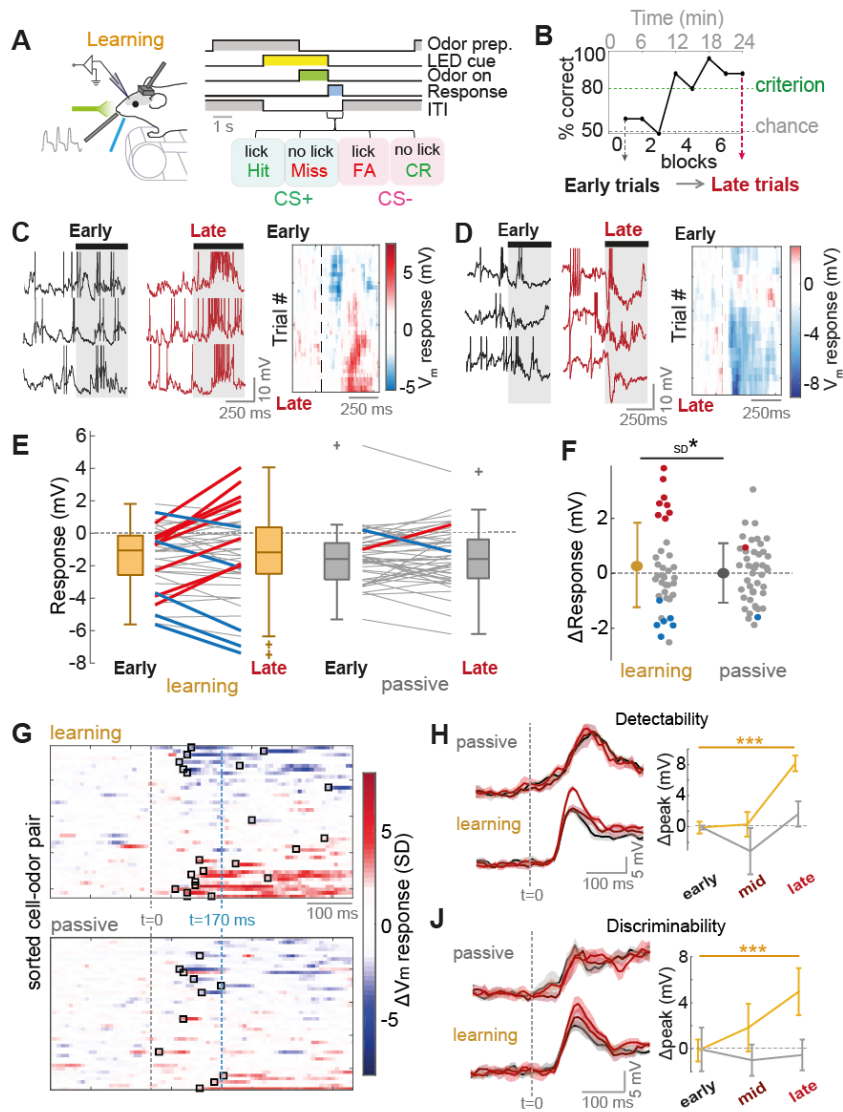

**Figure 2. Diverse odor response changes occur within the very first sniff cycle in learning mice**

(A) Diagram of the recording paradigm (left) and schematic of go/no-go task sequence (right). (B) Example learning curve for one mouse across the recording timeframe. Responses are compared between five early trials (unlearned) and five late trials (learned) to assess learning-related changes. (C) Left: example odor response traces in early and late for a cell-odor pair undergoing increase in excitation across learning (spikes have been clipped). Shaded area indicates odor stimulus (aligned to first inhalation onset). Right: heatmap showing 5-trial moving average of membrane potential response across trials (D) As for panel C, but for a response undergoing an increase in inhibition. (E) Plot of early and late membrane potential responses (first 500 ms) for learning mice (left; n=42 cell-odor pairs) and passive mice (right; n=46 cell-odor pairs) separately. Thick red lines indicate significant positive change ( $p < 0.01$ ), thick blue lines indicate significant negative change. (F) Comparison of response changes (late-early) for learning and passive mice. Red dots show significant positive changes, blue dots show significant negative changes. (G) Response change heatmaps (late-early average membrane potential waveforms) normalized by baseline SD. Black boxes indicate onset of change ( $> 2$  SD for at least 5 consecutive points).  $T = 170$  ms is indicated as the minimal detected reaction time. *Continued on next page...*



(H) Left plots: Euclidean distance as a function of time since odor onset ( $t=0$ , aligned to first inhalation onset) between population vectors for odor response, and control vectors initiated by an inhalation during the inter-trial interval. This gives an indication of the detectability of the odor response across the sample. Black plot is calculated from early trials, maroon plot is calculated from mid-point trials, and red plot is calculated from late trials. Each is averaged over 5 trial subsets (see methods for details), and shaded area indicates standard deviation. Right: plot to show peak detectability within the first 170 ms of the stimulus across early, mid-point and late trials. Plot shows mean across the 5 trial subsets, and errorbars show standard deviation. Gold plot is for learning mice ( $n=42$  cell-odor pairs), and grey plot is for passive mice ( $n=46$  cell-odor pairs). (J) As for H, but with the Euclidean distance measured between population vectors for the CS+ and CS- to give an indication of the discriminability of the two responses across the sample.

164 recording for learning (peak early =  $19.8 \pm 1$  mV, late =  $25.0 \pm 2$  mV,  $p = 5 \times 10^{-4}$ ; Figure 2J) but  
165 not passive mice (peak early =  $20.4 \pm 1.9$  mV, late =  $19.9 \pm 1.3$  mV,  $p = 0.68$ ). Since both  
166 discriminability and detectability peaked within 100 ms from odor onset, this enhanced  
167 representation occurred within the timescale of the first sniff cycle.

168 Thus, diverse response changes specifically occur across learning occurring on the timescale  
169 of a single sniff cycle, giving rise to enhanced early odor representation.

### 170 ***Active sampling strategies emerge across task learning***

171 What are the mechanisms underlying these response changes? Odors are acquired from the  
172 environment through sniffing behavior, which is subject to complex contextual modulation  
173 (Kepecs et al., 2007; Wachowiak, 2011; Wesson et al., 2009). To analyze sniff changes within  
174 the short 500 ms time-window of the odor stimulus, we measured sniffing using an external  
175 flow sensor and quantified the mean inhalation duration (MID) of all inhalations completed  
176 within the first 500 ms of the stimulus (Figure 3A). When comparing early and late learning  
177 trials, we noticed that mice showed significant changes in sniff behavior during the odor  
178 stimulus, with faster, sharper inhalations emerging gradually across learning (reduced MID,  
179 Figure 3B). Reductions in MID mirrored increases in sniffing frequency across trials (Figure  
180 3C), and are thus indicative of faster sniffing.

181 Across all cell-odor pairs, a large fraction underwent significant changes in MID during learning  
182 (26%, 10/38 cell odor pairs; Figure 3D). In stark contrast, passively exposed mice showed far

183 more stable MID, with only 12% of cell odor pairs showing significant change (Figure 3D), and  
184 substantially less variation in the  $\Delta$ MID; learning: SD = 24 ms, passive: SD = 9 ms,  $p = 3 \times 10^{-8}$ ,  
185 Bartlett test; Figure S6A). Comparing cumulative histograms of the MID change between  
186 learning and passive mice revealed that a significantly larger proportion of learning mice  
187 underwent reductions in MID exceeding 20 ms (learning: 26%, passive: 2%;  $p < 0.01$ ,  
188 bootstrapping; Figure 3E). Changes in MID across the population of learning mice again  
189 correlated very well with changes in sniff frequency ( $R^2 = 0.59$ ,  $p = 3 \times 10^{-8}$ ; Figure 3F).

190 In learning mice, changes in MID were highly correlated between rewarded and unrewarded  
191 odors ( $R^2 = 0.54$ ,  $p = 3 \times 10^{-4}$ , Figure S6B) and already the first inhalation after odor onset  
192 showed a pronounced reduction in duration (Figure 3G), with a tight correlation between  
193 changes in MID and changes in the first inhalation duration (FID;  $R^2 = 0.77$ ,  $p = 7 \times 10^{-13}$ ; Figure  
194 3H). Together this suggests that rapid sniffing in learning mice is likely to reflect an active  
195 sampling strategy rather than changes concomitant with reward anticipation or licking  
196 response.

197 What causes the variance in sniff changes across mice? Response vigour has previously been  
198 used as a measure of motivation levels in mice (Berditchevskaia et al., 2016). We noted that  
199 some mice would respond more eagerly to the CS+ stimulus than others, with larger frequency  
200 of anticipatory licking (licking 500-2000 ms after odor onset) in the late trials after learning was  
201 complete, while others would wait during the odor stimulus and only lick during the subsequent  
202 response period (Figure 3J). The number of anticipatory licks in late trials correlated well with  
203 the change in MID across learning, with reductions in MID associated with higher frequency  
204 anticipatory licking ( $R^2 = 0.54$ ,  $p = 4 \times 10^{-4}$ ; MID change averaged across CS+ and CS- for each  
205 cell-odor pair; Figure 3K). Since the correlations existed for changes in MID for both CS+ and  
206 CS- alone (Figure S6C), these associations were not due to simple motor effects relating to  
207 the go response or reward expectation. Reduced MID was also significantly associated with  
208 shorter reaction time (Figure 3L;  $R^2 = 0.23$ ,  $p = 0.04$ , MID change averaged across CS+ and  
209 CS- for each cell-odor pair).

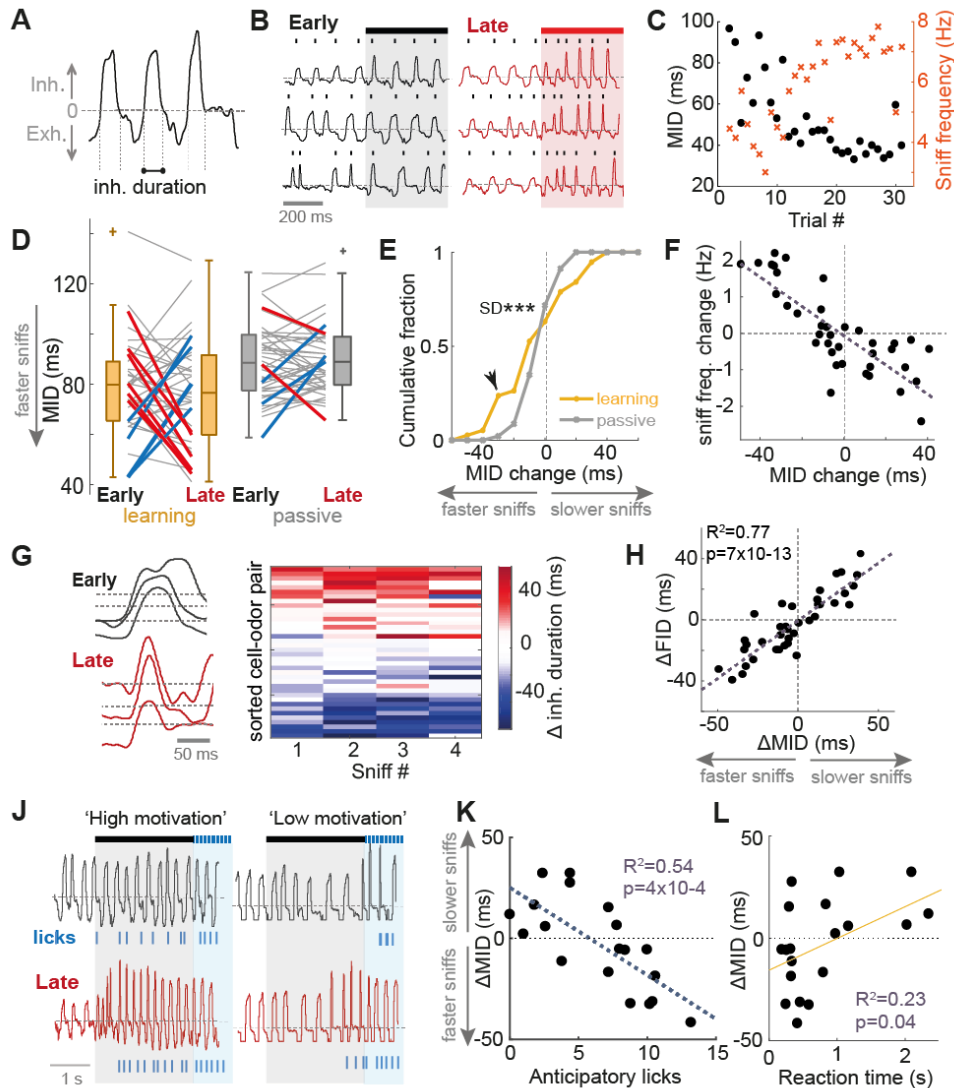

**Figure 3. Active sampling strategies emerge across task learning.**

(A) Diagram to show extraction of inhalation duration from example nasal flow trace. (B) Example nasal flow traces from one mouse showing emergence of rapid sniffing between early and late trials. (C) MID for example cell-odor pair in panel B calculated for each trial (first 500 ms of stimulus) in black dots. Orange crosses show corresponding sniff frequency for each trial. (D) Plot showing how MID changes between early and late trials, for learning ( $n=38$ ) and passive ( $n=42$ ) mice. Thick red lines show significant reductions in MID (faster sniffing), thick blue lines show significant increases in MID (slower sniffing). (E) Cumulative histograms of MID change for learning and passive mice compared. Black arrowhead shows significant difference in the histograms (see methods). (F) Scatter between change in MID and change in sniff frequency between early and late trials for all learning cell-odor pairs. (G) Left: example flow traces showing duration of the first inhalation (FID) after odor onset between early and late trials. Right: heatmap to show change in inhalation duration as a function of sniff number since odor onset, sorted by change in MID. (H) Scatter of changes in FID versus changes in MID. (J) Example nasal flow traces during CS+ presentations for ‘high motivation’ (left) and ‘low motivation’ mice (right). ‘Motivation’ here refers to the number of licks during the odor stimulus (‘anticipatory’ licks). Note sniff changes only occur for the ‘high motivation’ mouse. (K) MID change (averaged for each cell across CS+ and CS- stimuli) across learning as a function of the mean number of anticipatory licks in late trials for CS+ trials. (L) MID change (averaged for each cell across CS+ and CS- stimuli) across learning as a function of the reaction time calculated from divergent lick patterns.

211 Thus, mice displayed changes in active sampling strategy forming across the learning session,  
212 with the development of fast sniffing associated with high motivation and short reaction times.

### 213 ***Positive response changes are tightly linked to changes in active sampling***

214 Since the MTCs recorded in awake animals were widely modulated by sniffing (Figure 1E),  
215 and mice displayed changes in sniff strategy (Figure 3), we next wanted to test what impact  
216 the changes in active sampling had on the response changes observed across learning. We  
217 first split the dataset according to MID change: large MID change (>20 ms absolute change  
218 between early and late trials, n=18), and small MID change (<20 ms absolute change, n=20).  
219 Comparing heatmaps of response change between early and late trials for each dataset  
220 revealed that positive changes were exclusively displayed alongside large MID change (Figure  
221 4A). There was a significant increase in response variance for cell-odor pairs recorded  
222 alongside large MID change (early SD=1.8 mV, late SD=3.2 mV, p=0.02 Bartlett test), but not  
223 for small MID change (early SD=2.2 mV, late SD=2.2 mV; p=0.98 Bartlett test; Figure 4B).  
224 Altogether, responses recorded alongside large MID changes accounted for 7/8 significant  
225 positive response changes, and 2/5 inhibitory response changes, and showed significantly  
226 larger variance in response changes compared to those recorded alongside small MID  
227 changes (large sniff change: SD=1.9 mV, n=18; small sniff change: SD=1.1 mV, n=20;  
228 p=0.002, Bartlett test), and response changes in passive mice (passive SD=1.1 mV, p=0.002,  
229 Bartlett test, n=18 vs 46), while the small change dataset was indistinguishable from passive  
230 controls (p=0.94, Bartlett test, n=20 vs 46). In particular, there were significantly more positive  
231 response changes (>1 mV) in the large sniff change group (39%) compared to small sniff  
232 change (5%) and passive mice (11%; p<0.01, bootstrapping, see methods; Figure 4C).

233 To test the strength of associations between  $V_m$  response and active sampling further, we  
234 correlated the mean MID and  $V_m$  response across trials for each cell-odor pair. For cells  
235 undergoing positive response changes across learning, this resulted in robust significant  
236 correlations, as in Figure 4D, while those undergoing increases in inhibition showed no such  
237 tight correlation (Figure 4E). Overall, 88% (7/8) cell-odor pairs showing significant positive

238 changes across learning displayed highly significant correlations ( $p < 0.01$ ) between  $V_m$   
239 response and MID across trials. Increased inhibition however could not be explained by active  
240 sampling changes, with no significant correlations between changes in  $V_m$  response and  
241 inhalation duration for these 5 cell-odor pairs. This effect across the population resulted in a  
242 significant positive relationship between the response change occurring across learning and  
243 the  $R^2$  of the correlation between MID and response across trials ( $R^2 = 0.38$ ,  $p = 4 \times 10^{-5}$ ,  $n = 42$ ;  
244 Figure 4F).

245 We also assessed whether sniffing could account for the differences in response onsets and  
246 sniff- $V_m$  modulation amplitudes seen between passive and task-learning state (Figure 1D and  
247 E). Analysing these parameters over trials selected to match sniff parameters for each group  
248 demonstrated that differences in sniffing indeed accounted for differences in response onset  
249 and average sniff- $V_m$  modulation amplitudes, although passive cell-odor pairs still showed a  
250 tendency toward very large sniff- $V_m$  modulation amplitudes (Figure S7; see supplemental  
251 information).

252 How did changes in active sampling impact on changes in odor representation across the  
253 dataset? To test this we split the learning population according to MID change as before  
254 (Figure 4A-C). When recalculating the Euclidean distances for these individual datasets, we  
255 found that the increase in detectability largely occurred alongside large MID change (early  
256 peak =  $25.1 \pm 1.0$  mV, late peak =  $33.7 \pm 1.4$  mV;  $p = 7 \times 10^{-4}$ , unpaired t-test; Figure 4G), and was  
257 far smaller and less significant in those undergoing small MID change (early peak =  $20.0 \pm 1.2$   
258 mV, late peak =  $23.1 \pm 2.6$  mV;  $p = 0.04$ , unpaired t-test; Figure 4G). We found the same result  
259 for changes in discriminability, with a significant increase only in cases where  $\Delta$ MID for both  
260 CS+ and CS- stimuli was large (large  $\Delta$ MID: peak early =  $13.2 \pm 0.8$  mV, late =  $19.6 \pm 1.8$  mV,  
261  $p = 0.002$ , unpaired t-test; small  $\Delta$ MID: peak early =  $15.4 \pm 1.0$  mV, late =  $16.1 \pm 1.5$  mV,  $p = 0.28$ ,  
262 unpaired t-test; Figure 4H).

263

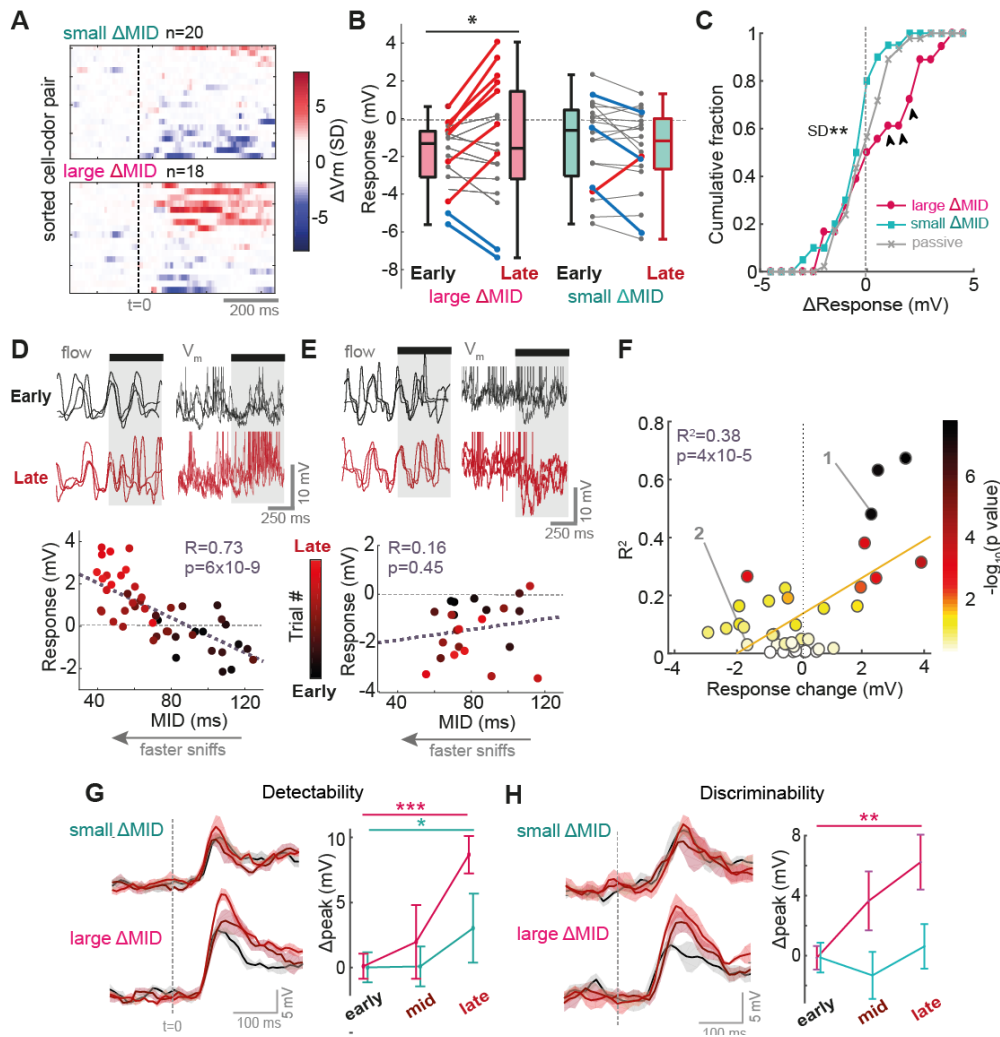

**Figure 4. Positive response changes are tightly linked to changes in active sampling.**

All data is from the learning dataset. **(A)** Response change heatmaps (late-early average  $V_m$  response) normalized by baseline SD, for small MID change ( $\Delta$ MID < 20 ms) and large MID change ( $\Delta$ MID > 20 ms). **(B)** Plot of early and late membrane potential responses (first 500ms) across learning for large  $\Delta$ MID (left;  $n=18$  cell-odor pairs) and small  $\Delta$ MID (right;  $n=20$  cell-odor pairs) separately. Thick red lines indicate significant positive change ( $p < 0.01$ ), thick blue lines indicate significant negative change. **(C)** Cumulative histograms for response changes in large  $\Delta$ MID, small  $\Delta$ MID and passive mice. Black arrowheads show significant differences between large  $\Delta$ MID vs both small  $\Delta$ MID and passive histograms (see methods). **(D)** Above: example nasal flow and  $V_m$  traces overlaid for 3 early and 3 late trials for a cell-odor pair undergoing significant increase in excitation across learning. Spikes have been clipped for display. Below: Scatter between MID and  $V_m$  response across trials for this cell-odor pair. Points have been colored according to trial number. **(E)** As for panel D, but for a cell undergoing a significant increase in inhibition across learning. **(F)** Scatter between the response change across learning (late-early), and the  $R^2$  value for correlations as in panels D-E, colored according to the p-value of the correlation. Note how all cases of strong positive response change exclusively show strong correlations with sniffing. **(G)** Left: Euclidean distance between population response vectors and baseline data, now split into cell-odor pairs recorded alongside large MID (>20 ms change,  $n=18$ ), and small MID (<20 ms change,  $n=20$ ). Right: plot to show peak detectability within the first 170 ms of the stimulus across early, mid-point and late trials. Plot shows mean across the 5 trial subsets, and errorbars show standard deviation. **(H)** As for panel G, but for the Euclidean distance between population response vectors for CS+ and CS- for learning data that is now split into cell-odor pairs recorded alongside large MID change (>20 ms change for both CS+ and CS-,  $n=8$  cells) and small MID change (any other cell,  $n=11$  cells).

264 Thus, positive response changes are associated with changes in active sampling, which  
265 enhances early odor representation in terms of both detectability and discriminability while  
266 negative response changes (increased inhibition), cannot be explained by sniff changes.

267 ***Active sampling and associated response changes are dynamically linked to task***  
268 ***engagement***

269 We next wanted to investigate the effect of dynamic changes in behavioral state on the  
270 changes in active sampling and odor responses observed. To do this, we recorded from 8 cell-  
271 odor pairs in an entirely new cohort of mice who were trained to criterion on the task prior to  
272 recording. If the rapid sniffing is indeed an active strategy for odor acquisition during behavior,  
273 we would expect the strategy to disappear if the task comes to an end (i.e. transition to passive  
274 odor exposure), and re-emerge when the task reinitiates. To test this, we implemented a  
275 paradigm in which task engagement could be reversibly changed by physically removing and  
276 re-introducing the water reward spout (Figure 5A), resulting in rapid switches between  
277 olfactory behavior and passive exposure as indicated by animal licking responses (Figure 5A  
278 and S8A-B). As predicted, animals robustly adapted their sniffing strategy upon elimination of  
279 the licking response after removal of the reward port (Figure 5B), with MID increasing (slower  
280 sniffing). Reintroduction of the reward port rapidly restored fast sniff behavior (reduced MID).

281 If active sampling determines positive response change as predicted from learning mice  
282 (Figure 3), we would expect positive changes to occur alongside the rapid sniffing strategy.  
283 We found that responses could change robustly and reversibly between task engagement,  
284 disengagement and re-engagement, with some examples showing dramatic and reversible  
285 switches between excitation and inhibition (Figure 5C-D and S8C). Consistent with the  
286 learning-related changes, positive changes always occurred alongside reduced MID (Figure  
287 5E-G) and were again tightly linked to the sniff changes on a trial-by-trial basis (Figure 5H-J),  
288 consistent with the idea that changes in neural responses are directly driven by sniff strategy.  
289 Strikingly, response changes could occur within only a single trial upon recognition of task re-

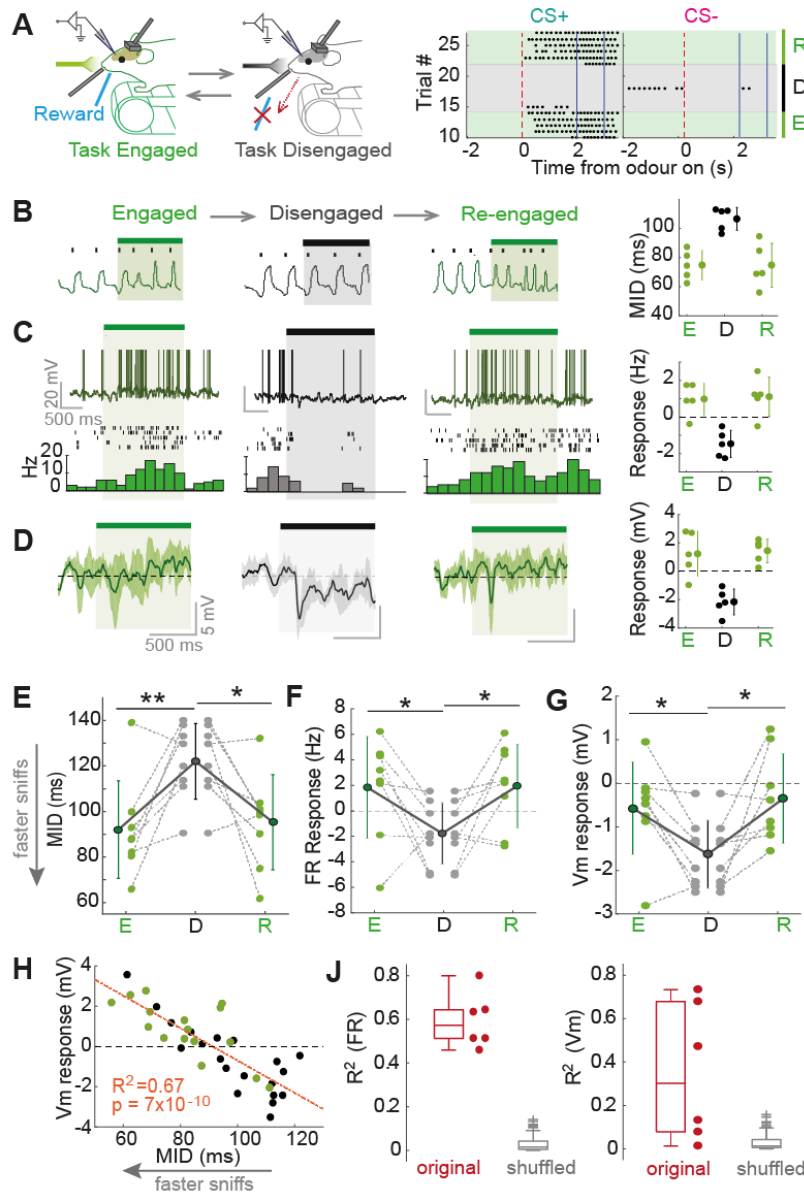

**Figure 5. Active sampling and associated response changes are dynamically linked to task engagement**

For all panels: green = task engaged, black = task disengaged. **(A)** Left shows experimental paradigm. Right shows lick raster across task switches for CS+ and CS- stimuli for an example mouse. **(B)** Example MID changes for one response across changes in task engagement (averaged over 500 ms, panels B-D correspond to same example). **(C)** Example FR response changes, (spikes partially clipped for display, averaged over 2 s). **(D)** Example  $V_m$  response changes (spike-subtracted, averaged over 500 ms). **(E)** For all 8 responses, changes in MID between task engagement, disengagement and re-engagement (asterisks denote result of paired T-test). **(F)** As for E, but for changes in 2 s FR responses. **(G)** As for E, but for changes in 500 ms  $V_m$  responses. **(H)** Scatter of MID versus  $V_m$  response across trials for an example cell-odor pair. **(J)** Left: boxplots to show corresponding  $R^2$  values (as for example in panel H) for all six FR responses showing significant changes across engagement shifts, alongside shuffle control. Right: as for left, but for  $V_m$  responses.



291 engagement (Figure S8D) emphasizing the dynamic nature with which changes in active  
292 sampling state influence neural responses.

293 ***Odor response changes associated with active sampling are dependent on behavioral***  
294 ***state***

295 We next wanted to assess whether the response changes observed during active sampling  
296 require attention to an olfactory stimulus, or whether any similar change in sniffing would cause  
297 the same response change regardless of behavioral state.

298 MTC activity is strongly patterned by sensory input locked to the sniff cycle in anaesthetized  
299 mice, giving rise to sniff-coupling of membrane potential (Adrian, 1950; Cang and Isaacson,  
300 2003; Fukunaga et al., 2012; Macrides and Chorover, 1972; Margrie and Schaefer, 2003).  
301 Similarly, in our awake animals, we found that membrane potential during odor stimulation  
302 showed widespread modulation by the sniff cycle, with a variety of sniff- $V_m$  modulation  
303 amplitudes (Figure 1E). Thus, it is possible that changes in response occurring with rapid  
304 sniffing at least partially result from bottom-up changes in the sniff-locked input pattern from  
305 OSNs.

306 We thus assessed whether evoking changes in sniffing similar to those observed in behaving  
307 animals could directly elicit response changes even in the absence of olfactory behavior. We  
308 found that unexpected whisker stimulation briefly increased sniff rates in passive mice (Figure  
309 6A), quantitatively reproducing (and even exceeding) the sniff changes seen during learning  
310 (Figure S9). When paired with odor delivery, this resulted in a variety of largely positive odor  
311 response changes ( $\Delta V_m = +0.65 \pm 0.82$  mV,  $p = 0.03$ , paired T-test,  $n = 10$ ; Figure 6B). If these are  
312 mediated by bottom-up effects on the sniff-locked input, we may expect the changes to  
313 correlate with the degree to which the response is sniff-coupled. Indeed, the response  
314 changes were strongly correlated with the amplitude of sniff- $V_m$  modulation, such that highly  
315 sniff locked cells underwent the largest changes when sniffing was altered (Figure 6C). These  
316 response changes are unlikely to be due to changes in arousal or from somatosensory input,

317 since they were similarly present in anaesthetized mice, where using a double tracheotomy  
318 the frequency of artificial sniffing (airflow through the nose) could be altered independent of  
319 free tracheal breathing (Figure 6D-E). Response changes in anaesthetized mice were also  
320 significantly correlated with sniff- $V_m$  modulation amplitude ( $R^2=0.71$ ,  $p=0.006$ ,  $n=9$ ; Figure 6F).  
321 Thus, in absence of olfactory behavior, evoking sniff changes results in response changes  
322 which depend on the amount of sniff-locked input to the cell.

323 We next wanted to assess whether this was the case in behaving mice. We thus pooled  
324 response changes from learning and task-engagement mice where MID underwent a change  
325 exceeding 20 ms (early-late or engaged-disengaged respectively). This gave us 26 cell-odor  
326 pairs in total. Plotting the absolute response change against the sniff-modulation amplitude  
327 resulted in a considerably different picture compared to passive and anaesthetized mice: there  
328 was no correlation between sniff- $V_m$  modulation strength and response change magnitude  
329 ( $R^2=0.02$ ,  $p=0.6$ ,  $n=26$ ; Figure 6G). Using the linear model resulting from the correlation  
330 calculated in passive mice ( $\Delta V_{ex}=0.26 \cdot T+0.21$  mV, where  $\Delta V_{ex}$ =expected  $V_m$  response  
331 change, and  $T$ = sniff- $V_m$  modulation amplitude), we generated expected values for  $V_m$   
332 response change based on the sniff- $V_m$  modulation amplitude of each cell odor pair, and  
333 compared these to actual values for response change. On average, only response changes  
334 in behaving mice exceeded that expected based on their sniff- $V_m$  modulation amplitude (mean  
335 actual-expected error= $0.5 \pm 1.2$  mV,  $p=0.03$ , paired t-test), and there was significantly more  
336 variance in the prediction error for response changes in behaving animals (actual-expected  
337 SD= $1.2$  mV) relative to passive (SD= $0.3$ ,  $p=3 \times 10^{-4}$ ) and anaesthetized mice (SD= $0.26$ ,  
338  $p=1 \times 10^{-4}$ ; Figure 6H).

339 While this suggests that sniff-evoked response changes in behaving mice exceed those  
340 expected based purely on sniff-locked feed-forward input, this does not mean that such  
341 response changes are any less linked to the sampling behavior of the animal. When  
342 comparing  $R^2$  values for the correlation between MID and  $V_m$  response across trials for each  
343 cell-odor pair, we found no significant differences in the distributions between anaesthetized,

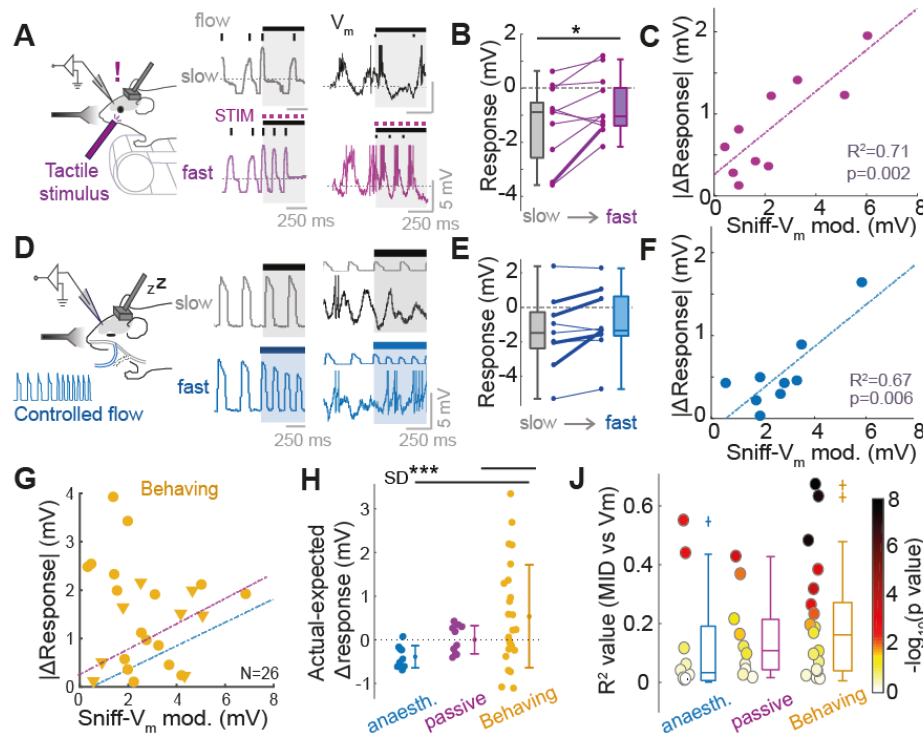

**Figure 6. Response changes associated with active sampling are dependent on behavioral state**

(A) Left: Experimental set up for tactile stimulation of passive mice. Example traces show nasal flow (middle) and  $V_m$  (right) for one cell: top = control trial (slow sniffing); bottom = tactile stimulus trial (fast sniffing). (B) Mean responses (first 500 ms of stimulus) averaged across 5 ‘slow’ and 5 ‘fast’ sniff trials for 10 cell-odor pairs ( $p < 0.05$ , paired T-test). (C) Scatter of response change between slow and fast sniff trials versus odor sniff- $V_m$  modulation amplitude during the odor. (D)-(F) as for the panels above, but for data from ‘simulated’ sniff changes in anaesthetized mice via a double tracheotomy procedure. (G) As for panels C and F, but for mice showing large sniff changes across learning (MID > 20 ms) Correlations from C and F have been included for comparison. (H) Plot comparing deviation of response change from the linear regression model calculated from passive mice (linear fit in panel E), for anaesthetised, passive and behaving mice. (J) Comparison of  $R^2$  values between MID and  $V_m$  response calculated across trials for each cell odor pair undergoing large MID change in anaesthetised, passive and behaving mice.

344 passive and behaving mice (Figure 6J), and the latter if anything displayed larger  $R^2$  values  
 345 (behaving: median=0.16, IQR=0.03-0.27; passive: median=0.10, IQR=0.03-0.21;  
 346 anaesthetised: median=0.03, IQR=0.01-0.19;  $p > 0.05$ , ranksum) and more frequent significant  
 347 relationships (behaving: 46%; passive: 40%; anaesthetised: 20%;  $p < 0.05$  linear regression).  
 348 Thus, sniff changes in all behavioral states will evoke response changes to a degree, but in  
 349 the behaving, actively sampling animal, these changes exceed those expected based only on  
 350 the feed-forward input to the cell. This likely indicates a state-dependent top-down component

351 underlying response changes during active sampling.

352 ***Effect of fast sniffing in absence of odor depends on feed-forward input in learning and***  
353 ***passive mice***

354 A previous study in the visual system has shown that modulation of visual responses happens  
355 temporally locked to saccade generation (Han et al., 2009). Since activity even in absence of  
356 odor is widely modulated by the sniff cycle (Cang and Isaacson, 2003; Fukunaga et al., 2012;  
357 Macrides and Chorover, 1972; Figure S4F), and sniff changes evoke activity changes in all  
358 behavioural states given that they are highly sniff-coupled (Figure 6), this made it likely that  
359 sniff changes even in absence of odor would cause activity changes. We wanted to test  
360 whether the enhancement of response change during active sampling (Figure 6G-H) occurred  
361 only during the odor stimulus, or whether there is a generally increased sensitivity to sniff  
362 changes during behavior that extends outside the stimulus sampling period.

363 To examine this, we made use of spontaneous bouts of rapid (>5 Hz) sniffing that occur in  
364 awake mice during the inter-trial interval – i.e. in absence of odor (Figure 7A). Consistent with  
365 previous imaging data (Kato et al., 2013), it was clear that in certain cells, overt depolarising  
366 and hyperpolarising changes in activity would occur coinciding with such rapid sniff bouts  
367 (Figure 7A). Quantifying the change in mean membrane potential evoked by fast sniffing  
368 across 26 MTCs revealed almost two thirds significantly changed their mean potential during  
369 fast sniffing, with 7 depolarizing and 9 hyperpolarizing ( $p < 0.05$ , bootstrapping – see methods,  
370 Figure 7A). Thus, sniff changes evoke response changes even in absence of odor. To test  
371 how these depended on bottom-up sniff-locked input, we again compared the magnitude of  
372 the response changes to their sniff- $V_m$  modulation amplitudes. This resulted in a robust  
373 correlation ( $R^2 = 0.46$ ,  $p = 0.001$ ,  $n = 26$ ; Figure 7B), indicating that these changes are again likely  
374 the result of changes in feed-forward input.

375 To test any differences in sensitivity to sniff change caused by behavioral state, we split the  
376 data into those from behaving mice ( $n = 16$ ) and those from passive mice ( $n = 10$ ). Comparing  
377 the actual  $V_m$  change to the expected  $V_m$  change (as calculated using the linear model

378 generated from the linear regression,  $\Delta V_{ex}=0.31 * T+0.01$  mV, where  $\Delta V_{ex}$ =expected absolute  
379  $V_m$  change, and  $T$ = sniff- $V_m$  modulation amplitude), showed that the difference between  
380 expected and actual  $V_m$  change did not significantly differ from zero for either passive (mean  
381 actual-expected= $0.17\pm 0.57$  mV,  $p=0.37$ , paired t-test,  $n=10$ ) or behaving cell-odor pairs (mean  
382 actual-expected= $-0.11\pm 0.36$  mV,  $p=0.25$ , paired t-test,  $n=16$ ; Figure 7C), and did not  
383 significantly differ between passive and behaving datasets ( $p=0.14$ , unpaired t-test;  $p=0.1$ ,  
384 Bartlett test). Altogether this indicates that enhanced response change during rapid sniffing in  
385 a behaving animal is only true during the odor sampling period.

386 Since cells could depolarise or hyperpolarise during fast sniffing, we sought to determine  
387 whether the sign of response change was also predictable from sniff-locking properties.  
388 Evidence from anaesthetized mice suggests that MCs are driven by feed-forward inhibition  
389 and lock to inhalation, while TCs are driven by feed-forward excitation and lock to exhalation  
390 (Fukunaga et al., 2012). To test this in awake mice, we recovered 9 morphologies of MTCs  
391 (e.g. Figure 7D), and identified them as MCs ( $n=5$ ) or TCs ( $n=4$ ). Congruent with the previous  
392 data, the two cell types had subthreshold membrane potential which locked to different phases  
393 of the sniff cycle: morphologically-confirmed MCs locked to inhalation, while TCs locked to  
394 exhalation (Figure 7E). We next examined the relationship between phase preference and the  
395 effect of fast sniffing across the full sample of cells. The sign of the change in activity during  
396 fast sniffs was strongly related to the phase coupling of the cell to the sniff cycle (Figure 7F),  
397 with inhalation-locked cells hyperpolarising and exhalation-locked cells depolarising. We  
398 calculated the phase boundaries for best separation of hyperpolarising and depolarising cells  
399 (as drawn in Figure 7F; see methods), and the phase preferences of morphologically identified  
400 MCs and TCs conformed to these boundaries (Figure 7F, red triangles and blue diamonds).  
401 Cells within the inhalation boundaries (0.39-4.11 rad; putative MCs) showed significantly more  
402 hyperpolarising effects of fast sniffing than those within the exhalation boundaries (4.11-0.39  
403 rad; putative TCs) (putative MC, median  $\Delta V_m=-0.39$  mV, IQR= $-0.66$  to  $-0.17$  mV,  $n=16$ ;  
404 putative TC median  $\Delta V_m= 0.19$ , IQR= $0.08-0.66$ ,  $n=11$ ;  $p=9\times 10^{-4}$ , Ranksum; Figure 7G).

405

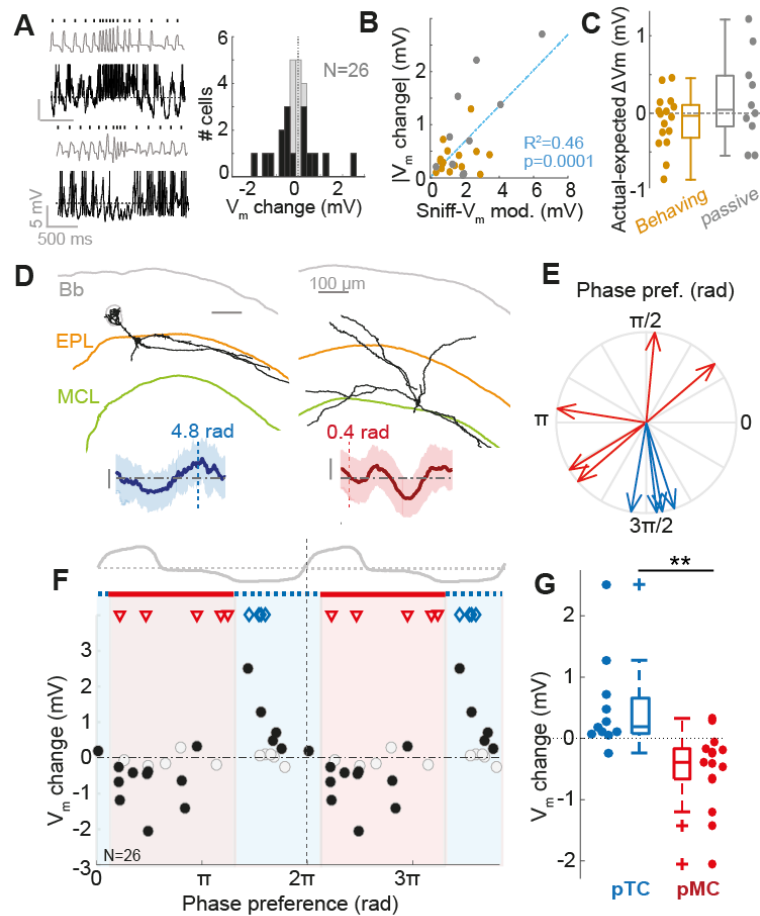

**Figure 7. Response changes in absence of odor are dependent on sniff-locked input**

(A) Right: awake mice will sometimes make spontaneous rapid sniff bouts in absence of odor during the inter-trial interval. Example traces show such sniff bouts, and coincident  $V_m$  traces showing overt activity changes. Left: Histogram to show distribution of  $V_m$  changes during spontaneous rapid sniffs (>5 Hz) for 26 MTCs in which there were >20 fast sniffs. (B) Correlation between absolute sniff change between slow and fast sniffs, and amplitude of baseline theta modulation. Grey dots show data from passive mice ( $n=10$ ), gold dots show data from behaving mice ( $n=16$ ). (C) Comparison of errors (actual-expected) when calculating expected  $V_m$  change based on the sniff- $V_m$  modulation amplitude of the baseline membrane potential for passive (grey), and behaving (gold) cell-odor pairs. (D) Morphologies of a reconstructed TC (left) and MC (right), with mean membrane potential as a function of phase shown below (shaded area=SD), with their respective phase preferences. Bb=brain border; EPL=external plexiform layer; MCL=mitral cell layer. (E) Phase plot to show preferences of 5 reconstructed MCs (red) and 4 reconstructed TCs (blue). (F)  $V_m$  change between fast and slow sniffing (fast-slow) as a function of the phase preference of the cell. Red shaded region corresponding to inhalation and subsequent pause shows the phases which best encompass hyperpolarising cells, thought to be MCs, and blue region best encompasses depolarising cells, thought to be TCs. Symbols show phase preferences of morphologically recovered cells: red triangles=MCs; blue diamonds=TCs. Black filled dots show significant  $V_m$  changes. (G) Comparison of  $V_m$  change due to fast sniffing for putative TCs and MCs defined by the phase boundaries shown in panel F.

406 Thus, in absence of odor, the effect of fast sniffing on response is predicted by the sniff-driven  
407 input of the cell regardless of behavioural state, and the sign of response allows identification  
408 of putative MCs and TCs.

409 ***Tufted cells show more highly correlated changes than mitral cells***

410 Since our data suggests involvement of extrabulbar circuits in shaping responses during active  
411 sampling, and previous work has suggested that both learning and neuromodulatory activity  
412 may have divergent effects on MC responses compared to TC responses (Kapoor et al., 2016;  
413 Yamada et al., 2017), we wanted to compare the response changes across learning for the  
414 two groups of cells. To this end we used the phase preference boundaries found earlier (Figure  
415 7F) to designate putative mitral (pMC) and tufted cell (pTC) phenotype. Consistent with the  
416 idea that these boundaries can separate TCs and MCs, mean firing rate responses to odors  
417 in pTCs showed a significant tendency toward strong excitation compared to pMCs (Figure  
418 S10), as has previously been demonstrated (Nagayama et al., 2004).

419 The distribution of early subthreshold responses (prior to learning) for pMCs and pTCs did not  
420 significantly differ (pTCs:  $-1.1 \pm 1.9$  mV,  $n=16$ ; pMCs:  $-1.8 \pm 2$  mV  $n=26$ ;  $p=0.26$ , unpaired t-test;  
421 Figure 8A), however pTCs showed significantly more positive responses compared to pMCs  
422 in late responses after learning was complete (pTCs: median= $0.3$  mV, IQR= $-1.3-1.1$  mV,  
423  $n=16$ ; pMCs: median= $-2.1$  mV, IQR= $-3.2-0.5$  mV,  $n=26$ ;  $p=0.01$ , Ranksum), consistent with  
424 previous findings that TCs show more excitatory responses and receive less lateral inhibition  
425 than MCs (Christie et al., 2001; Nagayama et al., 2004). Comparing response changes across  
426 learning for putative MCs and TCs, we found that the two groups did not significantly differ in  
427 terms of mean or variance of response change (pTCs:  $0.64 \pm 1.7$  mV; pMCs:  $-0.14 \pm 1.4$  mV;  
428  $p=0.1$ , unpaired t-test;  $p=0.46$ , Bartlett test; Figure 8B). Comparing the  $R^2$  values for the  
429 correlations between inhalation duration and  $V_m$  response across trials also indicated that in  
430 general, pMCs and pTCs do not show differing effects of sniffing on responses (pTCs: median  
431  $R^2=0.09$ , IQR= $0.01-0.29$ ; pMCs: median  $R^2=0.06$ , IQR= $0.03-0.18$ ;  $p=0.88$ , Ranksum;  $p=0.35$ ,  
432 Brown-Forsythe test; Figure 8C).

433 We next compared the response changes for CS+ and CS- stimuli across learning for pMCs  
434 and pTCs individually. For tufted cells, response changes for the two stimuli were highly  
435 significantly correlated ( $R^2=0.65$ ,  $p=0.002$ ,  $n=12$  cells), whereas this was not the case for  
436 pMCs ( $R^2=0.21$ ,  $p=0.13$ ,  $n=13$  cells; Figure 8D). The same difference was seen when looking  
437 at the R values between MID and  $V_m$  response across trials: pTCs showed highly correlated  
438 R values between CS+ and CS- stimuli ( $R^2=0.72$ ,  $p=0.001$ ,  $n=11$ ), while pMCs did not  
439 ( $R^2=0.26$ ,  $p=0.1$ ,  $n=12$ ; Figure 8E).

440 Since response changes were overall less correlated between CS+ and CS- for MCs, we  
441 wanted to compare the change in discriminability of the responses across learning for pMCs  
442 compared to pTCs. Using the Euclidean distance between population response vectors for  
443 CS+ and CS- stimuli, we found that pTCs did not show a significant change in peak  
444 discriminability across learning (mean peak early= $9.4\pm 1.6$ ; late= $10.4\pm 2.6$  mV,  $p=0.41$   
445 unpaired t-test,  $n=5$ ), however pMCs did show a significant increase in peak discriminability  
446 (mean peak early= $10.1\pm 0.4$ ; late= $13.1\pm 1.9$  mV,  $p=0.01$  unpaired t-test,  $n=5$ ; Figure 8F). Both  
447 cell types however significantly contributed to increased detectability of the stimulus across  
448 learning, though this was more pronounced for TCs rather than MCs (TCs: peak early=  
449  $15.9\pm 1.2$  mV, peak late= $21.5\pm 1.8$  mV,  $p=0.001$ , unpaired t-test; MCs: peak early= $31.0\pm 2.2$   
450 mV, peak late= $33.9\pm 1.1$  mV,  $p=0.01$ , unpaired t-test; Figure 8G).

451 Thus, while response changes across learning were generally quite similar for MCs and TCs,  
452 TCs showed more highly correlated changes while the less correlated changes in MCs appear  
453 to enhance discriminability of the stimuli.

## 454 Discussion

455 Active sampling behavior is a fundamental feature of sensory information acquisition.  
456 Theoretical and psychophysical evidence has driven hypotheses that active sampling  
457 strategies during behavior may be used to optimize sensory information flow (Ahissar and  
458 Assa, 2016; Laing, 1983; Yang et al., 2016). Here using whole-cell recordings in awake mice,



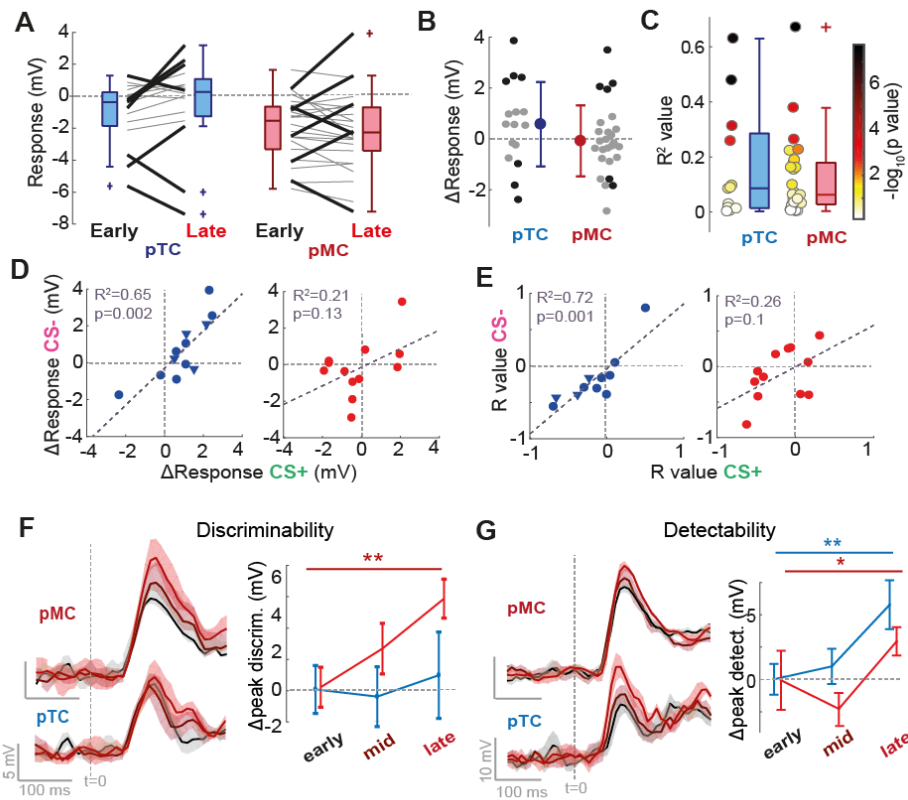

**Figure 8. Tufted cells show more highly correlated changes than mitral cells.**

(A) Plot of early and late membrane potential responses (first 500 ms) across learning for pTCs (left; n=16 cell-odor pairs) and pMCs (right; n=26 cell-odor pairs) separately. Lick black lines show significant changes. (B) Comparison of response changes (late-early) for pTCs and pMCs cell-odor pairs. Black dots show significant changes ( $p < 0.01$ ). (C) Comparison of  $R^2$  values between MID and  $V_m$  response across trials for pTC and pMC cell-odor pairs. Color shows p-value of the correlation ( $-\log_{10}$ ). (D) Scatter of response change for CS+ vs response change for CS- for pTCs (left) and pMCs (right) independently. Triangles show data from task-engaged/disengaged recordings (as in Figure 5), where response change is calculated as engaged-disengaged response, while circles are from learning data (response change=late-early response). (E) As for G, but for the R value between MID and  $V_m$  response across trials for each cell odor pair. (F) Left: Euclidean distances for the discriminability between CS+ and CS- during early (black), mid (maroon) and late (red) trials, for pTCs (bottom) and pMCs (top) independently. Right: Left: plot of average peak discriminability in the first 170 ms of the stimulus for early, mid and late trials for pTCs (blue) and pMCs (red) Plot shows mean, and error bars show SD across 5 trial subsets. (G) Right: Euclidean distances (as in Figure 4) for the detectability between CS+ and CS- during early (black), mid (maroon) and late (red) trials, for pTCs (bottom) and pMCs (top) independently. Left: plot of average peak detectability in the first 170 ms of the stimulus for early, mid and late trials for pTCs (blue) and pMCs (red) Plot shows mean, and errorbars show SD across 5 trial subsets.

459 we found a number of differences in subthreshold responses between passive and learning  
 460 mice (Figure 1), with variance in responses developing across the rapid learning episode  
 461 (Figure 2). In parallel, we found that active sniffing develops across learning in motivated mice

462 (Figure 3), which corresponds to changes in odor response (Figure 4 and 5), ultimately serving  
463 to improve odor representation. Moreover, we show that this cannot be predicted from simple  
464 feed-forward mechanisms (Figure 6), a feature which only holds true during odor sampling  
465 (Figure 7), and occurs in a cell-type specific manner (Figure 8). Thus, we provide new  
466 evidence for coordinated modulation of early sensory processing during active sampling  
467 epochs, which serves to enhance early odor representation.

468 Rodents alter their sniffing pattern in all kinds of contexts (Wachowiak, 2011), both in absence  
469 of odor (Bramble and Carrier, 1983; Ikemoto and Panksepp, 1994; Wesson et al., 2008), as  
470 well as during odor sampling in behavioral tasks (Kepecs et al., 2007; Roland et al., 2016;  
471 Wesson et al., 2009; Youngentob et al., 1987). We show that a portion of the variance in odor  
472 sampling strategy can be explained by motivational state (Figure 3J-K). Thus, active sampling  
473 strategies are highly context dependent. Sniff changes will have an overt effect on highly sniff  
474 locked cells in absence of olfactory behavior dependent on their feed-forward input (Figure 6C  
475 and F), and an even more profound effect on a wider range of cells if the animal is engaged  
476 in odor-directed active sampling (Figure 6G-H). As such, the precise effect of sniff changes  
477 on mitral/tufted cell activity is itself dependent on behavioral context. Changes in sniffing  
478 strategy could therefore provide a common mechanistic basis for a number of different  
479 contextual modulations described in OB activity (Beshel et al., 2007; Chu et al., 2016; Di Prisco  
480 and Freeman, 1985; Freeman and Schneider, 1982; Fuentes et al., 2008; Kay and Laurent,  
481 1999; Pager et al., 1972; Rinberg et al., 2006; Doucette and Restrepo 2008). However, we  
482 note that some variance in response cannot be explained by active sampling, such as the  
483 increases in inhibition during learning we note here (Figure 4E and F). The enhancement of  
484 odor representation seen during active sampling could explain the improvement in  
485 discrimination performance previously reported for mice displaying active sniffing strategies  
486 (Kepecs et al., 2007), as well as the faster reaction times noted here (Figure 3L).

487 Odor responses during active stimulus sampling are enhanced compared to changes seen  
488 during sniff changes in absence of olfactory behavior (Figure 6). This suggests the

489 involvement of top-down centers that serve to coordinate sensory processing at the periphery  
490 with the active sampling state of the animal (Wachowiak et al., 2011). Congruently, several  
491 neuromodulatory centers which project to the OB interact with respiratory control centers in  
492 the brainstem, including serotonergic fibers and the noradrenergic locus coeruleus (Dugué  
493 and Mainen, 2009; Yackle et al., 2017). We find a cell-type specificity in the effect of active  
494 sampling on response changes congruent with recent imaging across learning (Yamada et al.,  
495 2017), and neuromodulatory centers have recently been shown to have divergent effects on  
496 MCs and TCs – with serotonin having more heterogeneous effects on MCs and TCs (Kapoor  
497 et al., 2016). As such, neuromodulators are a prime candidate to coordinate OB state with  
498 active sampling behavior. In the whisker system, cholinergic afferents in the barrel cortex are  
499 known to be active during spontaneous whisking and mediate changes in physiology  
500 (Eggermann et al., 2014), while *in vivo* activation of these afferents boosts sensory input to  
501 the OB (Bendahmane et al., 2016). Future investigation will be required to address which  
502 centers are activated during active sampling, alongside their targets within the olfactory bulb  
503 circuit.

504 Complex orchestration of active sampling is similarly present in other sensory systems;  
505 whisking shows modulations during exploratory behavior (Mitchinson et al., 2007), and eye  
506 movement varies between tasks and individuals (Hayhoe and Ballard, 2014; Rayner et al.,  
507 2007) with both behaviours affecting sensory cortical activity (Crochet and Petersen, 2006;  
508 McFarland et al., 2015). Whether and how directed adjustments to such active sampling during  
509 behavior might also improve early sensory representations in these other modalities remains  
510 to be seen.

511 In conclusion, early sensory activity in the olfactory bulb is modulated by dynamic adjustments  
512 in the closed-loop pathway that coordinates active sniffing (Ahissar and Assa, 2016), yielding  
513 enhanced sensory representation during olfactory behavior.

## 514 **Author contributions**

515 A.T.S., R.J., I.F. and M.K. designed all experiments, R.J. performed all experiments, and analysed all  
516 data with help from A.T.S., I.F. and M.K. R.J. and A.T.S. wrote the article with contributions from I.F.  
517 and M.K. The authors declare no competing financial interests.

## 518 **Acknowledgements**

519 We thank Martyn Stopps and Nicholas Burczyk for assistance with custom made equipment,  
520 Mostafa Nashaat and Edward Bracey for initial support with behavioral training, Christoph  
521 Schmidt-Hieber for advice on whole-cell recording *in vivo*, and Roma Shusterman, Alexander  
522 Fleischmann, Kevin Franks, Mahesh Karnani, Denis Burdakov, Michael Hausser, Tim  
523 Gollisch, Tobias Ackels and Ede Rancz for helpful comments on the manuscript. This work  
524 was supported by the Francis Crick Institute which receives its core funding from Cancer  
525 Research UK (FC001153), the UK Medical Research Council (FC001153), and the Wellcome  
526 Trust (FC001153); by the UK Medical Research Council (grant reference MC\_UP\_1202/5); by  
527 the DFG (SPP 1392); and a Boehringer Ingelheim Fonds PhD fellowship to R.J. AS is a  
528 Wellcome Trust Investigator (110174/Z/15/Z).

## 529 **References**

- 530 Adrian, E.D. (1950). The electrical activity of the mammalian olfactory bulb.  
531 Electroencephalogr. Clin. Neurophysiol. 2, 377–388.
- 532 Ahissar, E., and Assa, E. (2016). Perception as a closed-loop convergence process. eLife 5.
- 533 Bendahmane, M., Ogg, M.C., Ennis, M., and Fletcher, M.L. (2016). Increased olfactory bulb  
534 acetylcholine bi-directionally modulates glomerular odor sensitivity. Sci. Rep. 6, 25808.
- 535 Berditchevskaia, A., Cazé, R.D., and Schultz, S.R. (2016). Performance in a GO/NOGO  
536 perceptual task reflects a balance between impulsive and instrumental components of  
537 behaviour. Sci. Rep. 6, 27389.
- 538 Beshel, J., Kopell, N., and Kay, L.M. (2007). Olfactory bulb gamma oscillations are enhanced  
539 with task demands. J. Neurosci. Off. J. Soc. Neurosci. 27, 8358–8365.
- 540 Bramble, D.M., and Carrier, D.R. (1983). Running and breathing in mammals. Science 219,  
541 251–256.
- 542 Cang, J., and Isaacson, J.S. (2003). In vivo whole-cell recording of odor-evoked synaptic  
543 transmission in the rat olfactory bulb. J. Neurosci. 23, 4108–4116.

- 544 Christie, J.M., Schoppa, N.E., and Westbrook, G.L. (2001). Tufted cell dendrodendritic  
545 inhibition in the olfactory bulb is dependent on NMDA receptor activity. *J. Neurophysiol.* *85*,  
546 169–173.
- 547 Chu, M.W., Li, W.L., and Komiyama, T. (2016a). Balancing the Robustness and Efficiency of  
548 Odor Representations during Learning. *Neuron* *92*, 174–186.
- 549 Chu, M.W., Li, W.L., and Komiyama, T. (2016b). Balancing the Robustness and Efficiency of  
550 Odor Representations during Learning. *Neuron* *92*, 174–186.
- 551 Chubykin, A.A., Roach, E.B., Bear, M.F., and Shuler, M.G.H. (2013). A cholinergic mechanism  
552 for reward timing within primary visual cortex. *Neuron* *77*, 723–735.
- 553 Crochet, S., and Petersen, C.C.H. (2006). Correlating whisker behavior with membrane  
554 potential in barrel cortex of awake mice. *Nat. Neurosci.* *9*, 608–610.
- 555 Di Prisco, G.V., and Freeman, W.J. (1985). Odor-related bulbar EEG spatial pattern analysis  
556 during appetitive conditioning in rabbits. *Behav. Neurosci.* *99*, 964–978.
- 557 Doucette, W., and Restrepo, D. (2008). Profound Context-Dependent Plasticity of Mitral Cell  
558 Responses in Olfactory Bulb. *PLOS Biol.* *6*, e258.
- 559 Dugué, G.P., and Mainen, Z.F. (2009). How serotonin gates olfactory information flow. *Nat.*  
560 *Neurosci.* *12*, 673–675.
- 561 Eggermann, E., Kremer, Y., Crochet, S., and Petersen, C.C.H. (2014). Cholinergic signals in  
562 mouse barrel cortex during active whisker sensing. *Cell Rep.* *9*, 1654–1660.
- 563 Engel, A.K., Fries, P., and Singer, W. (2001). Dynamic predictions: oscillations and synchrony  
564 in top-down processing. *Nat. Rev. Neurosci.* *2*, 704–716.
- 565 Ferezou, I., Bolea, S., and Petersen, C.C.H. (2006). Visualizing the cortical representation of  
566 whisker touch: voltage-sensitive dye imaging in freely moving mice. *Neuron* *50*, 617–629.
- 567 Fiser, A., Mahringer, D., Oyibo, H.K., Petersen, A.V., Leinweber, M., and Keller, G.B. (2016).  
568 Experience-dependent spatial expectations in mouse visual cortex. *Nat. Neurosci.* *19*, 1658–  
569 1664.
- 570 Freeman, W.J., and Schneider, W. (1982). Changes in spatial patterns of rabbit olfactory EEG  
571 with conditioning to odors. *Psychophysiology* *19*, 44–56.
- 572 Fuentes, R.A., Aguilar, M.I., Aylwin, M.L., and Maldonado, P.E. (2008). Neuronal Activity of  
573 Mitral-Tufted Cells in Awake Rats During Passive and Active Odorant Stimulation. *J.*  
574 *Neurophysiol.* *100*, 422–430.
- 575 Fukunaga, I., Berning, M., Kollo, M., Schmaltz, A., and Schaefer, A.T. (2012). Two distinct  
576 channels of olfactory bulb output. *Neuron* *75*, 320–329.
- 577 Gschwend, O., Abraham, N.M., Lagier, S., Begnaud, F., Rodriguez, I., and Carleton, A. (2015).  
578 Neuronal pattern separation in the olfactory bulb improves odor discrimination learning. *Nat.*  
579 *Neurosci.* *18*, 1474–1482.
- 580 Han, X., Xian, S.X., and Moore, T. (2009). Dynamic sensitivity of area V4 neurons during  
581 saccade preparation. *Proc. Natl. Acad. Sci.* *106*, 13046–13051.

- 582 Hayhoe, M., and Ballard, D. (2014). Modeling Task Control of Eye Movements. *Curr. Biol.* *24*,  
583 R622–R628.
- 584 Ikemoto, S., and Panksepp, J. (1994). The relationship between self-stimulation and sniffing  
585 in rats: does a common brain system mediate these behaviors? *Behav. Brain Res.* *61*, 143–  
586 162.
- 587 Ito, M., and Gilbert, C.D. (1999). Attention modulates contextual influences in the primary  
588 visual cortex of alert monkeys. *Neuron* *22*, 593–604.
- 589 Kapoor, V., Provost, A.C., Agarwal, P., and Murthy, V.N. (2016). Activation of raphe nuclei  
590 triggers rapid and distinct effects on parallel olfactory bulb output channels. *Nat. Neurosci.* *19*,  
591 271–282.
- 592 Kass, M.D., Rosenthal, M.C., Pottackal, J., and McGann, J.P. (2013). Fear Learning Enhances  
593 Neural Responses to Threat-Predictive Sensory Stimuli. *Science* *342*, 1389–1392.
- 594 Kato, H.K., Gillet, S.N., Peters, A.J., Isaacson, J.S., and Komiyama, T. (2013). Parvalbumin-  
595 expressing interneurons linearly control olfactory bulb output. *Neuron* *80*, 1218–1231.
- 596 Kay, L.M., and Laurent, G. (1999). Odor- and context-dependent modulation of mitral cell  
597 activity in behaving rats. *Nat. Neurosci.* *2*, 1003–1009.
- 598 Kepecs, A., Uchida, N., and Mainen, Z.F. (2007). Rapid and precise control of sniffing during  
599 olfactory discrimination in rats. *J. Neurophysiol.* *98*, 205–213.
- 600 Kollo, M., Schmaltz, A., Abdelhamid, M., Fukunaga, I., and Schaefer, A.T. (2014). “Silent”  
601 mitral cells dominate odor responses in the olfactory bulb of awake mice. *Nat. Neurosci.* *17*,  
602 1313–1315.
- 603 Laing, D.G. (1983). Natural sniffing gives optimum odour perception for humans. *Perception*  
604 *12*, 99–117.
- 605 Lenschow, C., and Brecht, M. (2015). Barrel cortex membrane potential dynamics in social  
606 touch. *Neuron* *85*, 718–725.
- 607 Macrides, F., and Chorover, S.L. (1972). Olfactory bulb units: activity correlated with inhalation  
608 cycles and odor quality. *Science* *175*, 84–87.
- 609 Margrie, T.W., and Schaefer, A.T. (2003). Theta oscillation coupled spike latencies yield  
610 computational vigour in a mammalian sensory system. *J. Physiol.* *546*, 363–374.
- 611 McFarland, J.M., Bondy, A.G., Saunders, R.C., Cumming, B.G., and Butts, D.A. (2015).  
612 Saccadic modulation of stimulus processing in primary visual cortex. *Nat. Commun.* *6*, 8110.
- 613 Mitchinson, B., Martin, C.J., Grant, R.A., and Prescott, T.J. (2007). Feedback control in active  
614 sensing: rat exploratory whisking is modulated by environmental contact. *Proc. R. Soc. Lond.*  
615 *B Biol. Sci.* *274*, 1035–1041.
- 616 Nagayama, S., Takahashi, Y.K., Yoshihara, Y., and Mori, K. (2004). Mitral and Tufted Cells  
617 Differ in the Decoding Manner of Odor Maps in the Rat Olfactory Bulb. *J. Neurophysiol.* *91*,  
618 2532–2540.
- 619 Niell, C.M., and Stryker, M.P. (2010). Modulation of visual responses by behavioral state in  
620 mouse visual cortex. *Neuron* *65*, 472–479.

- 621 Pager, J. (1974). A selective modulation of the olfactory bulb electrical activity in relation to  
622 the learning of palatability in hungry and satiated rats. *Physiol. Behav.* *12*, 189–195.
- 623 Pager, J., Giachetti, I., Holley, A., and Le Magnen, J. (1972). A selective control of olfactory  
624 bulb electrical activity in relation to food deprivation and satiety in rats. *Physiol. Behav.* *9*, 573–  
625 579.
- 626 Rayner, K., Li, X., Williams, C.C., Cave, K.R., and Well, A.D. (2007). Eye movements during  
627 information processing tasks: Individual differences and cultural effects. *Vision Res.* *47*, 2714–  
628 2726.
- 629 Rinberg, D., Koulakov, A., and Gelperin, A. (2006). Sparse odor coding in awake behaving  
630 mice. *J. Neurosci.* *26*, 8857–8865.
- 631 Roland, B., Jordan, R., Sosulski, D.L., Diodato, A., Fukunaga, I., Wickersham, I., Franks, K.M.,  
632 Schaefer, A.T., and Fleischmann, A. (2016). Massive normalization of olfactory bulb output in  
633 mice with a “monoclonal nose.” *eLife* *5*, e16335.
- 634 Takahashi, Y.K., Kurosaki, M., Hirono, S., and Mori, K. (2004). Topographic representation of  
635 odorant molecular features in the rat olfactory bulb. *J. Neurophysiol.* *92*, 2413–2427.
- 636 Wachowiak, M. (2011). All in a Sniff: Olfaction as a Model for Active Sensing. *Neuron* *71*, 962–  
637 973.
- 638 Wesson, D.W., Donahou, T.N., Johnson, M.O., and Wachowiak, M. (2008). Sniffing behavior  
639 of mice during performance in odor-guided tasks. *Chem. Senses* *33*, 581–596.
- 640 Wesson, D.W., Verhagen, J.V., and Wachowiak, M. (2009). Why sniff fast? The relationship  
641 between sniff frequency, odor discrimination, and receptor neuron activation in the rat. *J.*  
642 *Neurophysiol.* *101*, 1089–1102.
- 643 Yackle, K., Schwarz, L.A., Kam, K., Sorokin, J.M., Huguenard, J.R., Feldman, J.L., Luo, L.,  
644 and Krasnow, M.A. (2017). Breathing control center neurons that promote arousal in mice.  
645 *Science* *355*, 1411–1415.
- 646 Yamada, Y., Bhaukaurally, K., Madarász, T.J., Pouget, A., Rodriguez, I., and Carleton, A.  
647 (2017). Context- and Output Layer-Dependent Long-Term Ensemble Plasticity in a Sensory  
648 Circuit. *Neuron*.
- 649 Yang, S.C.-H., Wolpert, D.M., and Lengyel, M. (2016). Theoretical perspectives on active  
650 sensing. *Curr. Opin. Behav. Sci.* *11*, 100–108.
- 651 Youngentob, S.L., Mozell, M.M., Sheehe, P.R., and Hornung, D.E. (1987). A quantitative  
652 analysis of sniffing strategies in rats performing odor detection tasks. *Physiol. Behav.* *41*, 59–  
653 69.

654

## 655 **Methods**

656 All animal experiments were approved by the local ethics panel of the Francis Crick Institute  
657 (previously National Institute of Medical Research) and UK Home Office under the Animals  
658 (Scientific Procedures) Act 1986. All mice used were C57BL/6 Jax males aged between 5 and

659 8 weeks obtained by in house breeding. All chemicals were obtained from Sigma-Aldrich  
660 (Missouri, USA).

### 661 ***Head-fixation***

662 For surgical procedures, strict sterile technique was adhered to. Mice were anaesthetized with  
663 isoflurane in 95% oxygen (5% for induction, 1.5-3% for maintenance), and received general  
664 analgesia (Carprofen, 5mg/kg s.c.) as well as local analgesia around the dorsal surface of the  
665 head (Levobupivacaine or Mepivacaine, 0.5% s.c.). A custom-made stainless steel headplate  
666 was affixed to the intraparietal and parietal skull plates with a combination of cyanoacrylate  
667 and dental cement, while a recording chamber was constructed upon the bone overlying the  
668 right olfactory bulb using a plastic ring and dental cement. The chamber was filled with silicone  
669 (Quik-Cast - World Precision Instruments, Florida, USA) and sealed during the recovery and  
670 training periods prior to recordings. After 48 hours recovery, mice going on to passive  
671 experiments were head-fixed under very light isoflurane anesthesia (identical to the trained  
672 mice, see below) and allowed to awaken on a custom-made treadmill. Mice were allowed to  
673 accustom themselves to the treadmill in this initial 20 minute session, by the end of which mice  
674 showed no stress behavior and learned to walk and sit calmly on the treadmill. Mice going on  
675 to behavioral training underwent 2 days of additional water scheduling prior to head-fixation,  
676 and in the initial head-fixation session were additionally allowed access to abundant free  
677 rewards (diluted sweetened condensed milk) upon licking at the reward spout.

### 678 ***Go/No-Go behavior***

679 The day following head-fixation habituation, mice undergoing go/no-go training progressed to  
680 two more days of pre-training for acquisition of the go/no-go task. On the first day mice were  
681 presented only the CS+ odor and were trained to acquire the 'go' licking pattern following odor  
682 offset via a delay classical conditioning procedure. Note that no measure was in place to  
683 prevent or punish licking behavior during the odor stimulus, and some mice would additionally  
684 lick during the odor stimulus prior to the allotted response time after odor offset (termed  
685 'anticipatory licking'). Following successful learning of this lick pattern, the next day mice were



686 presented both the CS+ and CS- on a pseudorandom basis. Mice had to learn to respond to  
687 these odors differentially, learning to inhibit responses ('no-go' behavior) for the CS- to avoid  
688 a 5 s addition to the ITI. Only when mice had successfully demonstrated learning of this task  
689 (two consecutive 10-trial blocks of at least 80% correct responses) they were moved on to  
690 whole-cell recording procedures the next day. After successful acquisition of a recording, mice  
691 were presented a novel pair of odor stimuli assigned each to CS+ or CS-, and had to learn the  
692 go/no-go behavior for these new stimuli. Criterion within a recording was considered one block  
693 of at least 80% performance. Learning of the task with the second pair of stimuli was always  
694 far more rapid than for the original acquisition (Figure S2B), well within whole-cell recording  
695 timescale in awake mice. For mice undergoing the task engagement/disengagement  
696 paradigm, acquisition of the task occurred prior to recording such that criterion performance  
697 was already achieved from the start of the recording. After 20-30 trials, the water port was  
698 manually moved away to disengage the task. Mice would continue to attempt to lick (as  
699 detected by infrared beam) for a variable number of trials before 'giving up' (i.e. 5 consecutive  
700 'miss' trials), after which the port was returned. Often a free reward was used as a salient  
701 stimulus to the mouse that the task was re-engaged.

## 702 ***Odor delivery***

703 Odor stimuli were delivered using a custom-made airflow dilution olfactometer with electronic  
704 dilution control. All odor stimuli were calibrated using a mini photoionization detector (miniPID,  
705 Aurora Scientific, Ontario, Canada) to form square-pulses of 1% concentration (relative to  
706 maximum recorded vapor-pressure in air, Figure S1). Odor stimuli used for initial go/no-go  
707 training purposes consisted of peppermint oil and almond oil - components that were not  
708 present in the odor mixtures later presented in recordings. For stimuli during whole-cell  
709 recordings, 2 were randomly selected from 4 potential odor mixtures (Figure S1), and for  
710 behaving mice randomly assigned to CS+ or CS-. Odor mixtures were comprised of 4 to 6  
711 monomolecular odorants selected for their reported ability to activate dorsal glomeruli  
712 (Takahashi et al., 2004), grouped according to similarity of vapor pressure, and added to the

713 mixture in an undiluted quantity inversely proportional to their relative vapor pressures (Figure  
714 S1). Odors were presented with a minimum inter-trial interval of 10 s. To minimize  
715 contamination, a high flow clean air stream was passed through the olfactometer manifolds  
716 during this time. Constant air-flow going to the animal was achieved using a final valve,  
717 minimizing any tactile component accompanying the odor stimulus.

### 718 ***Whole-cell recordings***

719 Animals were again anaesthetized under isoflurane as before, and recording chambers were  
720 re-opened. A 1-2 mm craniotomy and durectomy was made over the right olfactory bulb. The  
721 craniotomy was then covered with a 0.5-1 mm layer of 4% low melting-point agar, which  
722 greatly contributed to the stability of recordings. This layer was removed and re-applied after  
723 every descent of a recording micropipette. The recording chamber was then filled with cortex  
724 buffer (125 mM NaCl, 5 mM KCl, 10 mM HEPES, 2 mM MgSO<sub>4</sub>, 2 mM CaCl<sub>2</sub>, 10 mM glucose),  
725 and the mice were transitioned to head-fixation and allowed 30 minutes to recover from  
726 anesthesia. After this time, behaving animals would demonstrate retention of go/no-go  
727 behavior acquired the day previously prior to attempt for a recording. Micropipettes were  
728 prepared with a resistance of 5-8 MΩ from borosilicate glass (Hilgenberg, Malsfeld, Germany)  
729 capillaries, and filled with intracellular solution (130 mM KMeSO<sub>4</sub>, 10 mM HEPES, 7 mM KCl,  
730 2 mM ATP-Na, 2 mM ATP-Mg, 0.5 mM GTP, 0.05 mM EGTA, and in some cases 10 mM  
731 biocytin). Signals were amplified using an Axoclamp 2B amplifier (Molecular devices – West  
732 Berkshire, UK) and digitized by a Micro 1401 (Cambridge Electronic Design – Cambridge, UK)  
733 at 25 kHz. Drift in membrane potential, corrected for by spike thresholds, between the start  
734 and end of recordings was 0.9±1 mV, with an average duration of 14±4 minutes, and access  
735 resistance of 36±19 MΩ.

### 736 ***Sniff measurement***

737 Sniffing behavior was recorded either with a pressure sensor or flow sensor (Sensortech  
738 – Rugby, UK), externally located in close proximity to the left naris (contralateral to recording

739 side). The precise orientation relative to the nostril was manually optimized prior to each  
740 recording in order to acquire the full sniff waveform in spite of any movement of the naris.

#### 741 ***Double tracheotomy***

742 Two mice were anaesthetized with 'sleep-mix' (0.05 mg/kg Fentanyl, 5 mg/kg Midazolam, 0.5  
743 mg/kg Medetomidine), and both local and general analgesia applied as above for head-  
744 fixation. After the head-plate surgery, a double tracheotomy was performed by exposing the  
745 trachea and inserting two catheters, one directed to the lungs through which the mouse could  
746 freely breathe, and the other directed to the nasal passages through which flow was controlled.  
747 To mimic sniffing, a peristaltic pump (Ismatec, Wertheim, Germany) was used to generate flow  
748 inward through the nares, with a flow controller to buffer out fluctuations and the periodic  
749 opening of a 3-way valve used to simulate regular inhalations, either at 3.3 Hz (100 ms opening  
750 times), or 6.6 Hz (50 ms opening times).

#### 751 ***Neuronal numbers***

752 Altogether we report here recordings from 66 mitral and tufted cells. We report data from 42  
753 cell-odor pairs from behaving animals over the timescale of learning (21 cells from 20 animals),  
754 46 cell-odor pairs from passively exposed animals (23 cells from 20 animals), 8 cell-odor pairs  
755 from animals undergoing the task engagement/disengagement paradigm (4 cells from 4  
756 animals), 10 cell-odor pairs from passive mice undergoing the unexpected puff experiment (9  
757 cells from 9 animals), and 9 cells from two anaesthetized mice with a double tracheotomy.  
758 None of these cohorts are overlapping. Of the cells from mice across learning, 2 were  
759 excluded from any sniff analysis due to poor sniff signals (resulting in 38 cell-odor pairs, 20  
760 accompanied by small (<20 ms) sniff changes, 18 by large sniff changes), and 2 were  
761 excluded similarly from the passively exposed dataset (42 cell-odor pairs).

## 762 **Data analysis**

763 All data was pre-processed in Spike2 version 7.1 (Cambridge Electronic Design – Cambridge,  
764 UK) and analyzed in Matlab 2015b (Mathworks - Massachusetts, USA) and R using custom  
765 scripts and functions.

## 766 **Statistics**

767 In all cases, 5-95% confidence intervals were used to determine significance unless otherwise  
768 stated. In all figures, a single asterisk denotes  $p < 0.05$ , double asterisk denoted  $p < 0.01$  and a  
769 triple asterisk denotes  $p < 0.001$ . Where these are preceded by 'SD', the p-value refers to the  
770 variances rather than the averages of the datasets. Means and error bars showing a single  
771 standard deviation either side are used in all cases for normally distributed data of equal  
772 variance. Two-sided Student's t-tests were used for comparison of means and Bartlett tests  
773 used to compare variances, unless otherwise stated. Boxplots are used to represent any other  
774 data (data comparisons of unequal variance, or non-normally distributed data), where median  
775 is plotted as a line within a box formed from 25<sup>th</sup> (q1) and 75<sup>th</sup> (q3) percentile. Points are drawn  
776 as outliers if they are larger than  $q3 + 1.5 \times (q3 - q1)$  or smaller than  $q1 - 1.5 \times (q3 - q1)$ . For  
777 such data, Ranksum tests were used to compare the medians, and Browne-Forsythe tests  
778 used to compare variance, unless otherwise stated. To determine points of significant  
779 difference between cumulative histograms, a bootstrapping method was used. Firstly, data  
780 underlying the two histograms would be shuffled between datasets, and cumulative  
781 histograms would be calculated from these shuffled sets. The difference at each point between  
782 the two histograms would then be calculated. This was repeated 10,000 times, and the  
783 differences between the real cumulative histograms would then be compared to the shuffled  
784 distribution at each point. An arrow was drawn on the points at which the actual difference  
785 exceeded the 99th percentile of the shuffled distribution.

## 786 **Sniffing analysis**

787 To extract inhalation durations, firstly inhalation peaks were detected as any peak above a  
788 certain threshold set according to the amplitude of the signal. Inhalation onset was set at the

789 nearest point pre-peak that the flow trace crossed zero, while inhalation offset was set at the  
790 nearest point post-peak that the flow trace crossed zero. The distance between these points  
791 was taken as the inhalation duration. The mean inhalation duration for the first 500ms of each  
792 odor presentation was calculated from the duration of all complete inhalations within that time  
793 period.

#### 794 ***Principal cell identification***

795 Mitral and tufted cells were distinguished from interneurons as previously (Kollo et al., 2014).  
796 The current data set was pooled with the entire data set of neurons recorded in the OB of  
797 awake mice acquired previously (Kollo et al., 2014), and independent component analysis was  
798 performed on the AHP waveform (2 to 25 ms from spike onset) to reveal three independent  
799 components, upon which hierarchical cluster analysis was used to band the cells into two  
800 groups, 'principal' and 'other'. Based on cell morphologies from the previous data set, and an  
801 additional 12 acquired in the current data set, 100% of the 22 morphologies obtained from the  
802 'principal' group were confirmed as mitral/tufted cells, while 86 % of the 11 morphologies from  
803 the 'other' group were confirmed interneurons. Morphologies from the current data set were  
804 acquired as previously (Fukunaga et al., 2012; Kollo et al., 2014): mice were perfused  
805 following recordings with cold phosphate-buffered saline, followed by 4% (wt/vol)  
806 paraformaldehyde solution in phosphate-buffered saline. Fixed olfactory bulbs were  
807 embedded in porcine gelatin (10% wt/vol), before being fixed overnight in 4%  
808 paraformaldehyde. The OBs were then cut into 150  $\mu$ m slices with a vibratome (Thermo  
809 Scientific – Massachusetts, USA) and stained with avidin-biotinylated peroxidase (ABC kit -  
810 Vector Labs, California, USA) and the DAB reaction. Biocytin-stained cells were traced using  
811 a Neurolucida system (MBF Bioscience, Vermont, USA). Principal cells were identified via  
812 soma size, cell body location with respect to the mitral cell layer, an apical dendrite reaching  
813 the glomerular layer and lateral dendrites branching in the external plexiform layer. MCs were  
814 distinguished from TCs based on proximity to the mitral cell layer.

815 ***Odor responses and changes***

816 For all analyses, the first presentation of each odor was excluded due to the elicitation of high  
817 frequency sniffing by the novel odorant, which rapidly decayed by the second presentation  
818 (Wesson et al., 2008). **General response calculations:** All traces were aligned to first  
819 inhalation onset following final valve opening. For  $V_m$  response calculations, spike waveforms,  
820 including the AHP, were subtracted from the  $V_m$  trace (-5 to 20 ms after spike peak).  
821 Responses for each trial were calculated as the mean  $V_m$  within the first 500 ms post odor  
822 onset, normalized to the baseline membrane potential in the 2 s prior to odor onset. FR  
823 responses were calculated as the mean number of spikes per 0.25 s time bin in the first 500  
824 ms post odor onset, normalized to that calculated for 2 s prior to odor onset. Significant  
825 responses were determined for both  $V_m$  and FR using a paired t-test to compare baseline and  
826 odor-evoked activity for all trials. **For response changes across learning:** Significant  
827 changes between early and late trials for each odor response were identified by comparing  
828 the five 'early trials' in block 1 (stimulus presentation #2 to 6), with the 5 last presentations of  
829 the stimulus ('late trials'). Significant change was determined using an unpaired t-test,  $p < 0.05$ .  
830 **To determine onset of response change:** For each response, the mean  $V_m$  response  
831 waveform calculated for early trials was subtracted from that calculated from late trials, to  
832 generate a response change waveform at each time-point from odor onset. This was then  
833 normalised by the standard deviation of this resulting waveform during the baseline period 2  
834 s prior to odor onset. Response change onset was detected where the response change  
835 magnitude first exceeded 2 standard deviations and remained there for at least 50 ms. **For**  
836 **task engagement/disengagement changes:** The first 500 ms of the stimulus was analyzed  
837 for  $V_m$  responses, and the full 2 s for FR responses. 5 trials of initial engagement were defined  
838 as the last 5 trials of each stimulus prior to physical port removal, disengagement trials were  
839 defined as 5 trials with at least 3 consecutive misses within the block, and re-engagement  
840 trials were based on the first 5 trials of the stimulus after the mouse initiates licking after port  
841 return.

## 842 ***Detectability and discriminability analysis***

843 For each response, five mean  $V_m$  response waveforms were generated from different sets of  
844 3 early trials, 3 mid-point trials (mid-point trial  $\pm$  2 trials either side) and 3 late trials (aligned to  
845 first inhalation post odor onset). 3 early, 3 mid-point, and 3 late corresponding mean baseline  
846 waveforms were made by averaging inhalation-triggered waveforms from the ITI. Population  
847 response vectors were then constructed from these mean response waveforms for all cell-  
848 odor pairs recorded. At each time point relative to inhalation onset, the Euclidean distance  
849 was calculated between response and baseline vectors, and this was repeated five times for  
850 each baseline vector to gain a mean detectability over time, and a standard deviation.  
851 Minimum detection times were calculated as the first time post-inhalation where the mean  
852 detectability exceeded 2.5 x the SD of the baseline mean detectability, and remained so for at  
853 least 50 ms. The average baseline Euclidean distance 200 ms prior to odor onset was  
854 subtracted from the trace, normalizing the baseline to zero. Peaks of detectability were defined  
855 as the maximum detectability within the first 170 ms after odor onset. Discriminability was  
856 analyzed similarly, however the response vectors used to calculate the Euclidean distances  
857 were calculated between CS+ and CS- mean  $V_m$  response waveforms for the five sets of early,  
858 mid-point and late trials, i.e. the Euclidean distance was generated between population  
859 responses for CS+ and CS- separately.

## 860 ***Sniff- $V_m$ modulation amplitudes and preferences***

861 The sniff- $V_m$  modulation properties of each cell were calculated as previously (Fukunaga et  
862 al., 2012). **Baseline sniff- $V_m$  modulation:** due to the high variability of sniff behavior in awake  
863 mice, analysis was restricted to sniff cycles between 0.25 and 0.3s in duration, where also the  
864 preceding sniff cycle was within this range. Mean  $V_m$  from the spike-subtracted  $V_m$  trace was  
865 taken as a function of sniff cycle phase for at least 150 sniffs, and this was plotted as Cartesian  
866 coordinates. The angle of the mean vector calculated by averaging these Cartesian  
867 coordinates was taken as the phase preference of the cell, while the difference between the  
868 mean  $V_m$  at the preferred phase, and the minimum value on the mean  $V_m$  waveform was taken

869 as the amplitude of modulation. **Odor sniff- $V_m$  modulation:** This was calculated as for  
870 baseline, but based on the first four sniffs post odor onset for the 10 trials of lowest sniff rates.  
871 As odor responses can have both tonic and sniff-modulated components, the phase- $V_m$  trace  
872 for each sniff had to be normalized according to the linear vector connecting the  $V_m$  at the  
873 beginning and end of the sniff. To determine significance, a bootstrapping method was used:  
874 100 ms segments of  $V_m$  data were randomly selected for each cell and connected to form a  
875 shuffled dataset. The phase analysis was then performed on these shuffled datasets, and a  
876 modulation amplitude calculated and this was repeated 100 times. Significant modulation was  
877 assigned when the actual modulation amplitude exceeded that of the 95<sup>th</sup> percentile of shuffled  
878 data amplitudes.

### 879 ***Putative mitral cell versus tufted cell identification***

880 For each ITI, the mean  $V_m$  was calculated during sniffs of duration of <200 ms where also the  
881 preceding sniff was within this duration range ('fast sniffs'). This mean  $V_m$  was then normalized  
882 by subtracting the mean  $V_m$  during sniffs of duration 0.25 and 0.3s within the same ITI to  
883 calculate the 'fast-sniff evoked  $V_m$ '. Only cells with at least 20 such 'fast sniffs' within the  
884 recording were considered for the analysis. To determine significance, a bootstrapping  
885 method was used: the mean  $V_m$  for all sniffs within a trial was randomly shuffled, and the  
886 shuffled data analyzed as before 100 times. The actual fast-sniff evoked  $V_m$  was then  
887 compared to the 5<sup>th</sup> and 95<sup>th</sup> percentiles of the shuffled distribution in order to assign  
888 significance.

889 We noted that, consistent with anaesthetized mice (Fukunaga et al., 2012), there was a  
890 bimodal distribution of phase preferences for the sniff cycle in baseline membrane potential,  
891 one within exhalation phase, and another within inhalation phase. We hypothesized that these  
892 may correspond to MC and TC phenotypes respectively, as reported previously for  
893 anaesthetized animals (Fukunaga et al., 2012). The putative assignment to MC or TC was  
894 confirmed morphologically for 8 cells (Figure 7F), with MC and TC distinction based largely on



895 soma location relative to the mitral cell layer, as dendritic reconstruction was in many cases  
896 incomplete (Fukunaga et al., 2012).

### 897 ***Unexpected tactile stimulus experiments in passive mice***

898 In 10 passive mice, odors were presented as before, but this time with a random chance of an  
899 unexpected tactile stimulus to accompany the odor (25% chance) to evoke fast sniffing. Since  
900 the sniffing response to the tactile stimulus eventually habituated, for each response, the five  
901 trials with lowest MID were selected and compared to the five trials with highest MID. The  
902 difference in response for these sets of trials was then calculated for the first 500 ms of the  
903 stimulus as for learning mice.

### 904 ***Reaction times***

905 Reaction time calculations were based on 10 or more trials of 80% performance. **From lick**  
906 **behavior:** For each CS+ and CS-, lick probability was calculated in a moving time window of  
907 100 ms, aligned to the first inhalation after final valve opening. The difference between the  
908 probability of licking for CS+ and CS- for each time window was calculated, and the leading  
909 edge of the first window at which this calculated difference significantly deviated from the  
910 values calculated from the 2 s window prior to odor onset was considered the reaction time  
911 (Figure S2C). **From sniff behavior:** Inhalation and exhalation duration values were calculated  
912 for CS+ and CS- as a function of sniff number from odor onset. These values were compared  
913 between those calculated for CS+ and CS- using a t-test, and the decision time was calculated  
914 based on the first inhalation or exhalation within the series to show a significant difference  
915 (Figure S2D). For 12/21 mice there was a significant difference between CS+ and CS- sniffing.

### 916 ***Response onset analysis***

917 For each response, the mean  $V_m$  response waveform calculated for early trials was subtracted  
918 from that calculated from late trials, to generate a response change waveform at each time-  
919 point from odor onset. This was then normalized by the standard deviation of this resulting  
920 waveform during the baseline period 2 s prior to odor onset. Response change onset was

921 detected where the response change magnitude first exceeded 2 standard deviations and  
922 remained there for at least 50 ms. To determine the effect of sniff changes on response onset,  
923 only the first inhalation after odor onset was considered, since only response onsets  $\leq 250$  ms  
924 – within the first sniff cycle – were analyzed. For each response, trials were categorized into  
925 ‘slow’ ( $>90$  ms inhalation duration) or ‘fast’ ( $<90$  ms) sniff trials. The mean normalized  $V_m$   
926 response waveform was averaged across these trials. Response onsets were calculated as  
927 before using these waveforms. Only cases where there were 5 or more trials in each category  
928 were analyzed. Cases where the mean 500 ms  $V_m$  response for either slow or fast sniffs was  
929 less than 0.5 mV in amplitude were also discarded. Response onsets from fast vs. slow trials  
930 were then compared across all responses for either behaving or passive mitral/tufted cells  
931 only to determine the effect of sniffing within each group. Response onsets were then  
932 compared between passive and behaving mitral/tufted cells for either slow or fast sniffs only,  
933 to determine any effect of behavioral state independent of sniff duration. To determine  
934 significant differences, a paired T-test was implemented for slow vs fast sniff groups within  
935 passive or behaving cohorts, or Ranksum tests were used when comparing between passive  
936 and behaving cohorts.
